# Supplementary material for: The pnictogen bond: a quantitative molecular orbital picture
Source: PubMed Central journal article supplement (PMC8297534; doi:10.1039/d1cp01571k), 2021-06-04
Supplement: CP-023-D1CP01571K-s001.pdf [file CP-023-D1CP01571K-s001.pdf]

## Contents

**Fig. S1.** Schematic FMO and DFT MO isosurfaces (at 0.04 a.u.) for a) the  $(D^{\cdot})_3$  molecule in its quadruplet valence state at  $C_{3v}$  symmetry and for the  $D_3Pn$  fragment in b) the ground state at  $C_{2v}$  symmetry and in c) the geometry of the complex at  $C_s$  symmetry.

**Fig. S2.** Activation strain (left panel) and energy decomposition (right panel) analyses of  $F_3Pn\cdots F^-$  pnictogen-bonded complexes (green,  $Pn = N$ ; black,  $Pn = P$ ; blue,  $Pn = As$ ; red,  $Pn = Sb$ ). The vertical lines indicate the position of the stationary points.

**Table S1.** Activation strain analyses (in  $\text{kcal mol}^{-1}$ ) of  $D_3Pn\cdots A^-$  pnictogen-bonds at the equilibrium geometries (in  $\text{\AA}$ , deg.).

**Table S2.** Energy decomposition analyses (in  $\text{kcal mol}^{-1}$ ) of  $D_3Pn\cdots A^-$  pnictogen-bonds at the equilibrium geometries.

**Table S3.** Activation strain and energy decomposition analyses (in  $\text{kcal mol}^{-1}$ ) of  $D_mZ\cdots A^-$  hydrogen bonds, halogen bonds, chalcogen bonds, and pnictogen bonds at the equilibrium geometries.

**Table S4.** Cartesian coordinates, bonding energies (in  $\text{kcal mol}^{-1}$ ) and the number of imaginary vibrational frequencies ( $N_{\text{imag}}$ ) for all stationary points of  $D_2N^{\cdot}$ ,  $D_3N$  and  $D_3N\cdots A^-$  structures, computed at ZORA-M06/QZ4P.

**Table S5.** Cartesian coordinates, bonding energies (in  $\text{kcal mol}^{-1}$ ) and the number of imaginary vibrational frequencies ( $N_{\text{imag}}$ ) for all stationary points of  $D_2P^{\cdot}$ ,  $D_3P$  and  $D_3P\cdots A^-$  structures, computed at ZORA-M06/QZ4P.

**Table S6.** Cartesian coordinates, bonding energies (in  $\text{kcal mol}^{-1}$ ) and the number of imaginary vibrational frequencies ( $N_{\text{imag}}$ ) for all stationary points of  $D_2As^{\cdot}$ ,  $D_3As$  and  $D_3As\cdots A^-$  structures, computed at ZORA-M06/QZ4P.

**Table S7.** Cartesian coordinates, bonding energies (in  $\text{kcal mol}^{-1}$ ) and the number of imaginary vibrational frequencies ( $N_{\text{imag}}$ ) for all stationary points of  $D_2Sb^{\cdot}$ ,  $D_3Sb$  and  $D_3Sb\cdots A^-$  structures, computed at ZORA-M06/QZ4P.

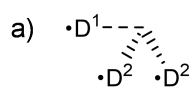

**Schematic FMO**

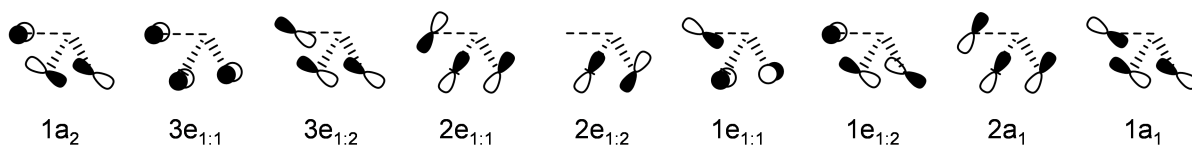

**DFT FMO**

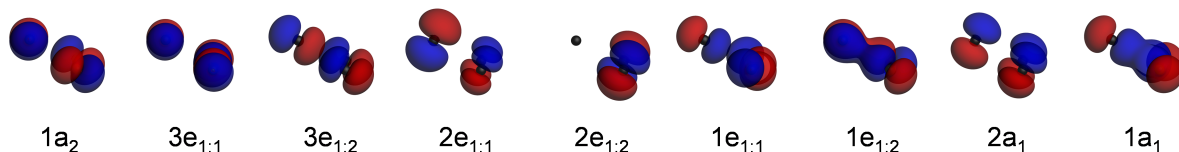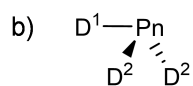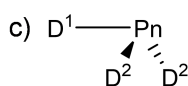

**Schematic FMO**

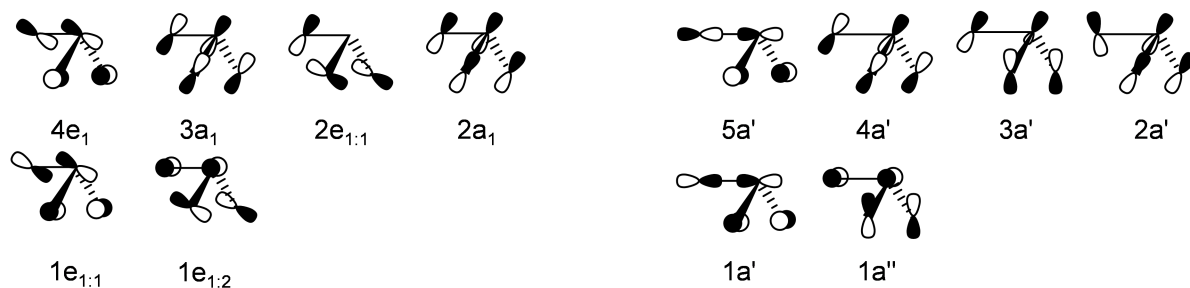

**DFT FMO**

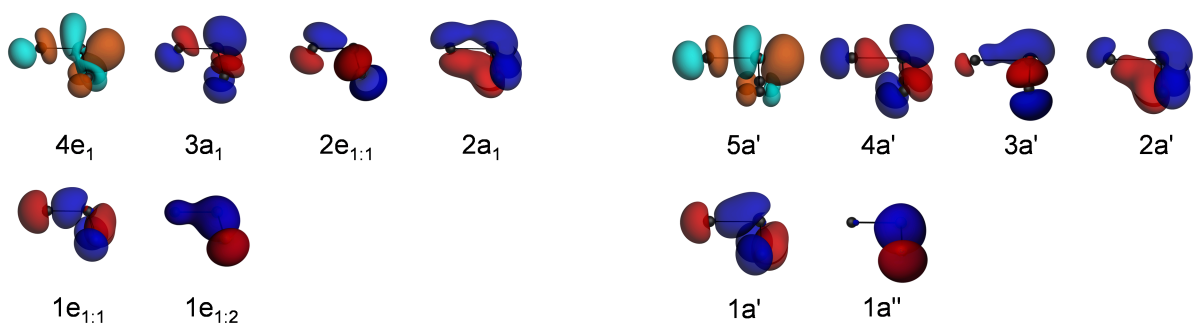

**Fig. S1.** Schematic FMO and DFT MO isosurfaces (at 0.04 a.u.) for (a) the  $(D^1)_3$  molecule in its quadruplet valence state at  $C_{3v}$  symmetry and for the  $D_3P_n$  fragment in (b) the ground state at  $C_{2v}$  symmetry and in (c) the geometry of the complex at  $C_s$  symmetry.

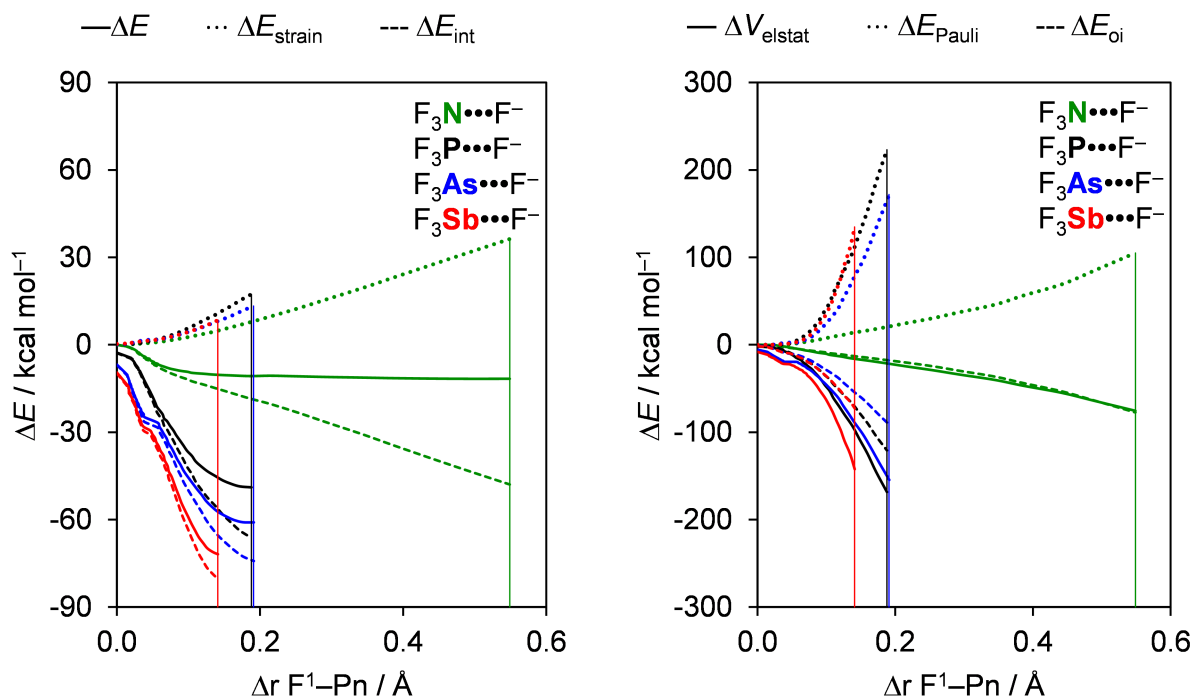

**Fig. S2.** Activation strain (left panel) and energy decomposition (right panel) analyses of  $\text{F}_3\text{Pn}\cdots\text{F}^-$  pnictogen-bonded complexes (green, Pn = N; black, Pn = P; blue, Pn = As; red, Pn = Sb). The vertical lines indicate the position of the stationary points.

**Table S1.** Activation strain analyses (in kcal mol<sup>-1</sup>) of D<sub>3</sub>Pn···A<sup>-</sup> pnictogen bonds at the equilibrium geometries (in Å, deg.).<sup>a</sup>

| D <sub>3</sub> Pn···A <sup>-</sup>   | ΔE    | ΔE <sub>strain</sub> | ΔE <sub>int</sub> | r <sub>Pn···A</sub> | r <sub>Pn-D'</sub> | r <sub>Pn-D''</sub> | Δr <sub>Pn-D'</sub> | Δr <sub>Pn-D''</sub> | Θ <sub>1</sub> | Θ <sub>2</sub> | Θ <sub>3</sub> | ΔΘ <sub>1</sub> | ΔΘ <sub>2</sub> |
|--------------------------------------|-------|----------------------|-------------------|---------------------|--------------------|---------------------|---------------------|----------------------|----------------|----------------|----------------|-----------------|-----------------|
| F <sub>3</sub> N···F <sup>-</sup>    | -11.8 | 32.5                 | -44.3             | 1.859               | 1.859              | 1.339               | 0.503               | -0.017               | 93.0           | 102.4          | 170.3          | -8.9            | 0.5             |
| F <sub>3</sub> N···Cl <sup>-</sup>   | -3.5  | 0.8                  | -4.3              | 3.239               | 1.404              | 1.347               | 0.048               | -0.009               | 100.4          | 102.3          | 168.3          | -1.5            | 0.4             |
| F <sub>3</sub> N···Br <sup>-</sup>   | -2.9  | 0.5                  | -3.5              | 3.484               | 1.396              | 1.348               | 0.040               | -0.008               | 100.7          | 102.2          | 166.8          | -1.2            | 0.3             |
| Cl <sub>3</sub> N···F <sup>-</sup>   | -30.4 | 55.7                 | -86.1             | 1.416               | 3.243              | 1.754               | 1.490               | 0.001                | 82.0           | 108.1          | 170.7          | -25.7           | 0.4             |
| Cl <sub>3</sub> N···Cl <sup>-</sup>  | -5.6  | 22.9                 | -28.5             | 2.328               | 2.328              | 1.757               | 0.575               | 0.004                | 99.9           | 106.9          | 146.6          | -7.8            | -0.8            |
| Cl <sub>3</sub> N···Br <sup>-</sup>  | -6.2  | 3.5                  | -9.7              | 2.920               | 1.902              | 1.777               | 0.149               | 0.024                | 104.9          | 106.8          | 145.6          | -2.8            | -0.9            |
| Br <sub>3</sub> N···F <sup>-</sup>   | -30.2 | 53.2                 | -83.3             | 1.411               | 3.323              | 1.928               | 1.417               | 0.022                | 84.5           | 108.5          | 165.7          | -24.0           | 0.0             |
| Br <sub>3</sub> N···Cl <sup>-</sup>  | -8.0  | 2.0                  | -10.0             | 2.813               | 2.017              | 1.932               | 0.111               | 0.026                | 105.7          | 107.7          | 149.4          | -2.8            | -0.8            |
| Br <sub>3</sub> N···Br <sup>-</sup>  | -7.0  | 17.2                 | -24.2             | 2.322               | 2.322              | 1.972               | 0.416               | 0.066                | 105.4          | 106.8          | 127.2          | -3.1            | -1.7            |
| F <sub>3</sub> P···F <sup>-</sup>    | -48.9 | 17.4                 | -66.4             | 1.753               | 1.753              | 1.608               | 0.189               | 0.044                | 86.9           | 98.7           | 189.4          | -10.6           | 1.2             |
| F <sub>3</sub> P···Cl <sup>-</sup>   | -16.0 | 4.4                  | -20.4             | 2.700               | 1.647              | 1.580               | 0.083               | 0.016                | 91.9           | 97.8           | 183.4          | -5.6            | 0.3             |
| F <sub>3</sub> P···Br <sup>-</sup>   | -12.9 | 3.0                  | -15.9             | 2.982               | 1.631              | 1.576               | 0.067               | 0.012                | 92.9           | 97.7           | 181.6          | -4.6            | 0.2             |
| Cl <sub>3</sub> P···F <sup>-</sup>   | -67.4 | 31.8                 | -99.3             | 1.649               | 2.627              | 2.103               | 0.572               | 0.048                | 88.6           | 100.2          | 181.4          | -11.8           | -0.2            |
| Cl <sub>3</sub> P···Cl <sup>-</sup>  | -25.5 | 14.4                 | -39.8             | 2.370               | 2.370              | 2.089               | 0.315               | 0.034                | 91.7           | 100.1          | 174.6          | -8.7            | -0.3            |
| Cl <sub>3</sub> P···Br <sup>-</sup>  | -20.5 | 10.7                 | -31.3             | 2.617               | 2.318              | 2.085               | 0.263               | 0.030                | 92.8           | 100.1          | 172.9          | -7.6            | -0.3            |
| Br <sub>3</sub> P···F <sup>-</sup>   | -71.0 | 30.2                 | -101.2            | 1.637               | 2.874              | 2.272               | 0.647               | 0.045                | 89.6           | 100.3          | 175.4          | -11.3           | -0.6            |
| Br <sub>3</sub> P···Cl <sup>-</sup>  | -28.5 | 15.4                 | -43.9             | 2.312               | 2.609              | 2.265               | 0.382               | 0.038                | 92.0           | 100.2          | 172.0          | -8.9            | -0.7            |
| Br <sub>3</sub> P···Br <sup>-</sup>  | -23.4 | 11.9                 | -35.3             | 2.550               | 2.550              | 2.261               | 0.323               | 0.034                | 93.0           | 100.2          | 170.6          | -7.9            | -0.7            |
| F <sub>3</sub> As···F <sup>-</sup>   | -61.0 | 12.6                 | -73.6             | 1.900               | 1.900              | 1.757               | 0.183               | 0.040                | 87.1           | 97.2           | 188.7          | -8.7            | 1.4             |
| F <sub>3</sub> As···Cl <sup>-</sup>  | -28.7 | 6.1                  | -34.9             | 2.595               | 1.836              | 1.744               | 0.119               | 0.027                | 89.5           | 95.8           | 182.3          | -6.3            | 0.0             |
| F <sub>3</sub> As···Br <sup>-</sup>  | -24.2 | 4.8                  | -29.0             | 2.820               | 1.820              | 1.741               | 0.103               | 0.024                | 90.2           | 95.6           | 180.4          | -5.6            | -0.2            |
| Cl <sub>3</sub> As···F <sup>-</sup>  | -70.0 | 18.7                 | -88.7             | 1.850               | 2.585              | 2.229               | 0.406               | 0.050                | 91.6           | 98.7           | 175.7          | -7.5            | -0.4            |
| Cl <sub>3</sub> As···Cl <sup>-</sup> | -35.1 | 11.3                 | -46.4             | 2.465               | 2.465              | 2.223               | 0.286               | 0.044                | 93.4           | 98.2           | 169.7          | -5.7            | -0.9            |
| Cl <sub>3</sub> As···Br <sup>-</sup> | -30.1 | 9.6                  | -39.7             | 2.668               | 2.437              | 2.220               | 0.258               | 0.041                | 93.9           | 98.2           | 167.9          | -5.2            | -0.9            |
| Br <sub>3</sub> As···F <sup>-</sup>  | -71.5 | 17.3                 | -88.8             | 1.843               | 2.789              | 2.391               | 0.447               | 0.049                | 93.0           | 99.1           | 172.0          | -6.7            | -0.6            |
| Br <sub>3</sub> As···Cl <sup>-</sup> | -37.0 | 10.7                 | -47.6             | 2.438               | 2.663              | 2.389               | 0.321               | 0.047                | 94.7           | 98.6           | 165.7          | -5.0            | -1.1            |
| Br <sub>3</sub> As···Br <sup>-</sup> | -32.0 | 9.2                  | -41.2             | 2.634               | 2.634              | 2.387               | 0.292               | 0.045                | 95.2           | 98.6           | 164.0          | -4.5            | -1.1            |
| F <sub>3</sub> Sb···F <sup>-</sup>   | -72.0 | 8.8                  | -80.8             | 2.037               | 2.037              | 1.930               | 0.144               | 0.037                | 85.4           | 97.0           | 193.9          | -8.9            | 2.7             |
| F <sub>3</sub> Sb···Cl <sup>-</sup>  | -38.9 | 5.8                  | -44.7             | 2.643               | 2.005              | 1.923               | 0.112               | 0.030                | 87.0           | 95.1           | 188.3          | -7.3            | 0.8             |
| F <sub>3</sub> Sb···Br <sup>-</sup>  | -33.6 | 5.0                  | -38.7             | 2.840               | 1.996              | 1.921               | 0.103               | 0.028                | 87.5           | 94.8           | 186.7          | -6.8            | 0.5             |
| Cl <sub>3</sub> Sb···F <sup>-</sup>  | -77.1 | 12.3                 | -89.4             | 2.017               | 2.649              | 2.399               | 0.301               | 0.051                | 89.4           | 97.6           | 183.7          | -7.6            | 0.6             |
| Cl <sub>3</sub> Sb···Cl <sup>-</sup> | -42.7 | 8.9                  | -51.7             | 2.592               | 2.592              | 2.393               | 0.244               | 0.045                | 90.5           | 96.7           | 178.4          | -6.5            | -0.3            |
| Cl <sub>3</sub> Sb···Br <sup>-</sup> | -37.3 | 8.0                  | -45.3             | 2.780               | 2.577              | 2.391               | 0.229               | 0.043                | 90.9           | 96.6           | 177.0          | -6.1            | -0.4            |
| Br <sub>3</sub> Sb···F <sup>-</sup>  | -77.7 | 11.5                 | -89.2             | 2.014               | 2.842              | 2.559               | 0.332               | 0.049                | 90.5           | 98.0           | 181.2          | -7.2            | 0.3             |
| Br <sub>3</sub> Sb···Cl <sup>-</sup> | -43.5 | 8.5                  | -52.0             | 2.580               | 2.782              | 2.556               | 0.272               | 0.046                | 91.6           | 97.2           | 175.6          | -6.1            | -0.5            |
| Br <sub>3</sub> Sb···Br <sup>-</sup> | -38.1 | 7.7                  | -45.8             | 2.766               | 2.766              | 2.555               | 0.256               | 0.045                | 91.9           | 97.0           | 174.2          | -5.8            | -0.7            |

<sup>a</sup> Computed at ZORA-M06/QZ4P.

**Table S2.** Energy decomposition analyses (in kcal mol<sup>-1</sup>) of D<sub>3</sub>Pn···A<sup>-</sup> pnictogen bonds at the equilibrium geometries.<sup>a</sup>

| D <sub>3</sub> Pn···A <sup>-</sup>       | ΔE <sub>int</sub> | ΔV <sub>elstat</sub> | ΔE <sub>Pauli</sub> | ΔE <sub>oi</sub> | ε(5a') | ⟨5a' np <sub>y</sub> ⟩ | ⟨5a' np <sub>y</sub> ⟩ <sup>2</sup> | ⟨4a' np <sub>y</sub> ⟩ | Pop <sub>5a'</sub> | Pop <sub>np<sub>y</sub></sub> | ΔQ <sub>D<sub>3</sub>Pn</sub> <sup>VDD</sup> |
|------------------------------------------|-------------------|----------------------|---------------------|------------------|--------|------------------------|-------------------------------------|------------------------|--------------------|-------------------------------|----------------------------------------------|
| <b>F<sub>3</sub>N···F<sup>-</sup></b>    | -44.3             | -66.9                | 89.6                | -67.0            | -5.1   | 0.12                   | 0.01                                | 0.05                   | 0.40               | 1.68                          | -0.30                                        |
| <b>F<sub>3</sub>N···Cl<sup>-</sup></b>   | -4.3              | -5.8                 | 4.5                 | -3.1             | -0.2   | 0.10                   | 0.01                                | 0.05                   | 0.02               | 1.99                          | -0.01                                        |
| <b>F<sub>3</sub>N···Br<sup>-</sup></b>   | -3.5              | -4.7                 | 3.5                 | -2.3             | -0.1   | 0.10                   | 0.01                                | 0.04                   | 0.02               | 2.00                          | 0.00                                         |
| <b>Cl<sub>3</sub>N···F<sup>-</sup></b>   | -86.1             | -208.3               | 431.6               | -309.5           | -6.5   | 0.13                   | 0.02                                | 0.08                   | 1.24               | 1.34                          | -0.65                                        |
| <b>Cl<sub>3</sub>N···Cl<sup>-</sup></b>  | -28.5             | -41.8                | 69.2                | -55.9            | -5.2   | 0.11                   | 0.01                                | 0.06                   | 0.54               | 1.59                          | -0.36                                        |
| <b>Cl<sub>3</sub>N···Br<sup>-</sup></b>  | -9.7              | -11.9                | 18.8                | -16.7            | -3.7   | 0.09                   | 0.01                                | 0.03                   | 0.26               | 1.75                          | -0.18                                        |
| <b>Br<sub>3</sub>N···F<sup>-</sup></b>   | -83.3             | -204.1               | 439.6               | -318.8           | -6.0   | 0.12                   | 0.01                                | 0.07                   | 1.25               | 1.38                          | -0.67                                        |
| <b>Br<sub>3</sub>N···Cl<sup>-</sup></b>  | -10.0             | -10.3                | 19.2                | -18.9            | -3.6   | 0.08                   | 0.01                                | 0.04                   | 0.23               | 1.86                          | -0.18                                        |
| <b>Br<sub>3</sub>N···Br<sup>-</sup></b>  | -24.2             | -51.1                | 95.0                | -68.1            | -4.6   | 0.12                   | 0.01                                | 0.08                   | 0.67               | 1.60                          | -0.44                                        |
| <b>F<sub>3</sub>P···F<sup>-</sup></b>    | -66.4             | -167.7               | 221.7               | -120.3           | -2.1   | 0.15                   | 0.02                                | 0.19                   | 0.28               | 1.75                          | -0.35                                        |
| <b>F<sub>3</sub>P···Cl<sup>-</sup></b>   | -20.4             | -40.4                | 46.0                | -25.9            | -1.2   | 0.22                   | 0.05                                | 0.17                   | 0.17               | 1.87                          | -0.12                                        |
| <b>F<sub>3</sub>P···Br<sup>-</sup></b>   | -15.9             | -29.1                | 30.7                | -17.4            | -1.1   | 0.25                   | 0.06                                | 0.16                   | 0.18               | 1.81                          | -0.09                                        |
| <b>Cl<sub>3</sub>P···F<sup>-</sup></b>   | -99.3             | -222.6               | 312.1               | -188.7           | -4.1   | 0.16                   | 0.03                                | 0.13                   | 0.48               | 1.70                          | -0.52                                        |
| <b>Cl<sub>3</sub>P···Cl<sup>-</sup></b>  | -39.8             | -84.8                | 119.2               | -74.2            | -3.1   | 0.20                   | 0.04                                | 0.12                   | 0.40               | 1.73                          | -0.31                                        |
| <b>Cl<sub>3</sub>P···Br<sup>-</sup></b>  | -31.3             | -64.2                | 86.5                | -53.6            | -2.9   | 0.20                   | 0.04                                | 0.08                   | 0.36               | 1.75                          | -0.26                                        |
| <b>Br<sub>3</sub>P···F<sup>-</sup></b>   | -101.2            | -228.4               | 331.2               | -204.1           | -4.2   | 0.15                   | 0.02                                | 0.12                   | 0.53               | 1.69                          | -0.56                                        |
| <b>Br<sub>3</sub>P···Cl<sup>-</sup></b>  | -43.9             | -95.9                | 141.9               | -89.8            | -3.4   | 0.19                   | 0.04                                | 0.13                   | 0.45               | 1.72                          | -0.37                                        |
| <b>Br<sub>3</sub>P···Br<sup>-</sup></b>  | -35.3             | -73.7                | 104.8               | -66.5            | -3.2   | 0.20                   | 0.04                                | 0.12                   | 0.42               | 1.72                          | -0.32                                        |
| <b>F<sub>3</sub>As···F<sup>-</sup></b>   | -73.6             | -145.4               | 158.0               | -86.2            | -2.6   | 0.15                   | 0.02                                | 0.15                   | 0.23               | 1.77                          | -0.30                                        |
| <b>F<sub>3</sub>As···Cl<sup>-</sup></b>  | -34.9             | -64.4                | 67.6                | -38.1            | -2.2   | 0.21                   | 0.04                                | 0.16                   | 0.20               | 1.84                          | -0.17                                        |
| <b>F<sub>3</sub>As···Br<sup>-</sup></b>  | -29.0             | -52.1                | 52.8                | -29.7            | -2.1   | 0.22                   | 0.05                                | 0.16                   | 0.18               | 1.85                          | -0.14                                        |
| <b>Cl<sub>3</sub>As···F<sup>-</sup></b>  | -88.7             | -166.5               | 194.3               | -116.5           | -3.7   | 0.16                   | 0.03                                | 0.11                   | 0.34               | 1.74                          | -0.42                                        |
| <b>Cl<sub>3</sub>As···Cl<sup>-</sup></b> | -46.4             | -85.5                | 101.9               | -62.8            | -3.2   | 0.21                   | 0.04                                | 0.11                   | 0.33               | 1.76                          | -0.29                                        |
| <b>Cl<sub>3</sub>As···Br<sup>-</sup></b> | -39.7             | -71.4                | 83.2                | -51.5            | -3.1   | 0.22                   | 0.05                                | 0.10                   | 0.31               | 1.78                          | -0.26                                        |
| <b>Br<sub>3</sub>As···F<sup>-</sup></b>  | -88.8             | -167.8               | 203.9               | -124.9           | -3.7   | 0.15                   | 0.02                                | 0.11                   | 0.37               | 1.75                          | -0.45                                        |
| <b>Br<sub>3</sub>As···Cl<sup>-</sup></b> | -47.6             | -89.9                | 112.3               | -70.1            | -3.3   | 0.20                   | 0.04                                | 0.11                   | 0.35               | 1.78                          | -0.33                                        |
| <b>Br<sub>3</sub>As···Br<sup>-</sup></b> | -41.2             | -75.9                | 92.9                | -58.3            | -3.3   | 0.21                   | 0.04                                | 0.10                   | 0.34               | 1.76                          | -0.31                                        |
| <b>F<sub>3</sub>Sb···F<sup>-</sup></b>   | -80.8             | -148.9               | 143.6               | -75.5            | -3.0   | 0.16                   | 0.03                                | 0.15                   | 0.20               | 1.82                          | -0.31                                        |
| <b>F<sub>3</sub>Sb···Cl<sup>-</sup></b>  | -44.7             | -82.6                | 83.4                | -45.4            | -2.7   | 0.23                   | 0.05                                | 0.18                   | 0.21               | 1.83                          | -0.21                                        |
| <b>F<sub>3</sub>Sb···Br<sup>-</sup></b>  | -38.7             | -70.7                | 70.9                | -38.9            | -2.7   | 0.24                   | 0.06                                | 0.18                   | 0.21               | 1.84                          | -0.19                                        |
| <b>Cl<sub>3</sub>Sb···F<sup>-</sup></b>  | -89.4             | -158.0               | 161.0               | -92.4            | -3.4   | 0.16                   | 0.03                                | 0.11                   | 0.26               | 1.79                          | -0.38                                        |
| <b>Cl<sub>3</sub>Sb···Cl<sup>-</sup></b> | -51.7             | -93.3                | 100.9               | -59.2            | -3.2   | 0.22                   | 0.05                                | 0.11                   | 0.28               | 1.80                          | -0.28                                        |
| <b>Cl<sub>3</sub>Sb···Br<sup>-</sup></b> | -45.3             | -81.1                | 87.3                | -51.5            | -3.1   | 0.23                   | 0.05                                | 0.10                   | 0.28               | 1.82                          | -0.27                                        |
| <b>Br<sub>3</sub>Sb···F<sup>-</sup></b>  | -89.2             | -157.4               | 166.1               | -97.9            | -3.4   | 0.16                   | 0.03                                | 0.10                   | 0.28               | 1.79                          | -0.41                                        |
| <b>Br<sub>3</sub>Sb···Cl<sup>-</sup></b> | -52.0             | -95.2                | 106.8               | -63.5            | -3.2   | 0.21                   | 0.04                                | 0.11                   | 0.29               | 1.81                          | -0.31                                        |
| <b>Br<sub>3</sub>Sb···Br<sup>-</sup></b> | -45.8             | -83.2                | 92.7                | -55.3            | -3.2   | 0.22                   | 0.05                                | 0.11                   | 0.30               | 1.81                          | -0.30                                        |

<sup>a</sup> Computed at ZORA-M06/QZ4P; ε(5a') = 5a' orbital energy of the prepared D<sub>3</sub>Pn fragment (in eV); ⟨Φ|np⟩ = overlap between the Φ orbital of the D<sub>3</sub>Pn fragment (see Fig. 2) and one of the np orbitals of the halide A<sup>-</sup>; Pop = Gross population (in electrons) of indicated orbital.

**Table S3.** Activation strain and energy decomposition analyses (in kcal mol<sup>-1</sup>) of D<sub>m</sub>Z...A<sup>-</sup> hydrogen bonds, halogen bonds, chalcogen bonds, and pnictogen bonds at the equilibrium geometries.<sup>a</sup>

| D <sub>m</sub> Z...A <sup>-</sup>   | ΔE    | ΔE <sub>strain</sub> | ΔE <sub>int</sub> | ΔV <sub>elstat</sub> | ΔE <sub>Pauli</sub> | ΔE <sub>oi</sub> |
|-------------------------------------|-------|----------------------|-------------------|----------------------|---------------------|------------------|
| FH...F <sup>-b</sup>                | -45.8 | 22.1                 | -67.9             | -76.2                | 72.9                | -64.6            |
| FF...F <sup>-b</sup>                | -30.5 | 28.0                 | -58.5             | -44.6                | 84.3                | -98.1            |
| FCl...F <sup>-b</sup>               | -52.3 | 14.0                 | -66.4             | -94.5                | 124.9               | -96.7            |
| FBr...F <sup>-b</sup>               | -62.3 | 10.0                 | -72.3             | -104.0               | 113.8               | -82.0            |
| FI...F <sup>-b</sup>                | -70.3 | 6.9                  | -77.2             | -116.9               | 115.3               | -75.7            |
| F <sub>2</sub> O...F <sup>-b</sup>  | -21.9 | 28.3                 | -50.2             | -55.3                | 87.5                | -82.4            |
| F <sub>2</sub> S...F <sup>-b</sup>  | -50.1 | 16.2                 | -66.3             | -126.5               | 168.3               | -108.1           |
| F <sub>2</sub> Se...F <sup>-b</sup> | -62.4 | 11.4                 | -73.7             | -124.6               | 136.6               | -85.7            |
| F <sub>2</sub> Te...F <sup>-b</sup> | -72.4 | 7.9                  | -80.3             | -134.6               | 132.8               | -78.6            |
| F <sub>3</sub> N...F <sup>-</sup>   | -11.8 | 32.5                 | -44.3             | -66.9                | 89.6                | -67.0            |
| F <sub>3</sub> P...F <sup>-</sup>   | -48.9 | 17.4                 | -66.4             | -167.7               | 221.7               | -120.3           |
| F <sub>3</sub> As...F <sup>-</sup>  | -61.0 | 12.6                 | -73.6             | -145.4               | 158.0               | -86.2            |
| F <sub>3</sub> Sb...F <sup>-</sup>  | -72.0 | 8.8                  | -80.8             | -148.9               | 143.6               | -75.5            |

<sup>a</sup> Computed at ZORA-M06/QZ4P.

<sup>b</sup> Computed at ZORA-M06/QZ4P (from: L. de Azevedo Santos, T. A. Hamlin, T. C. Ramalho, F. M. Bickelhaupt, *ChemistryOpen*, 2021, **10**, 391–401).

**Table S4.** Cartesian coordinates, bonding energies (in kcal mol<sup>-1</sup>) and the number of imaginary vibrational frequencies ( $N_{\text{imag}}$ ) for all stationary points of  $\text{D}_2\text{N}^\cdot$ ,  $\text{D}_3\text{N}$  and  $\text{D}_3\text{N}\cdots\text{A}^-$  structures, computed at ZORA-M06/QZ4P.

|                                                          |           |           |           |                                                          |           |           |           |
|----------------------------------------------------------|-----------|-----------|-----------|----------------------------------------------------------|-----------|-----------|-----------|
| <b><math>\text{F}_2\text{N}^\cdot</math></b>             |           |           |           | <b><math>\text{Cl}_2\text{N}^\cdot</math></b>            |           |           |           |
| $E = -411.44$                                            |           |           |           | $E = -319.10$                                            |           |           |           |
| $N_{\text{imag}} = 0$                                    |           |           |           | $N_{\text{imag}} = 0$                                    |           |           |           |
| N                                                        | 0.000000  | 0.000000  | 0.282592  | N                                                        | 0.000000  | 0.000000  | 0.205507  |
| F                                                        | 0.000000  | 1.045626  | -0.542918 | Cl                                                       | 0.000000  | 1.390469  | -0.754532 |
| F                                                        | 0.000000  | -1.045626 | -0.542918 | Cl                                                       | 0.000000  | -1.390469 | -0.754532 |
| <b><math>\text{Br}_2\text{N}^\cdot</math></b>            |           |           |           |                                                          |           |           |           |
| $E = -297.35$                                            |           |           |           |                                                          |           |           |           |
| $N_{\text{imag}} = 0$                                    |           |           |           |                                                          |           |           |           |
| N                                                        | 0.000000  | 0.000000  | 0.192269  |                                                          |           |           |           |
| Br                                                       | 0.000000  | 1.524174  | -0.839361 |                                                          |           |           |           |
| Br                                                       | 0.000000  | -1.524174 | -0.839361 |                                                          |           |           |           |
| <b><math>\text{F}_3\text{N}</math></b>                   |           |           |           | <b><math>\text{Cl}_3\text{N}</math></b>                  |           |           |           |
| $E = -534.67$                                            |           |           |           | $E = -388.25$                                            |           |           |           |
| $N_{\text{imag}} = 0$                                    |           |           |           | $N_{\text{imag}} = 0$                                    |           |           |           |
| N                                                        | 0.000000  | 0.000000  | 0.431961  | N                                                        | 0.000000  | 0.000000  | 0.436388  |
| F                                                        | -0.608092 | 1.053247  | -0.167194 | Cl                                                       | -0.817370 | 1.415727  | -0.197496 |
| F                                                        | -0.608092 | -1.053247 | -0.167194 | Cl                                                       | -0.817370 | -1.415727 | -0.197496 |
| F                                                        | 1.216184  | 0.000000  | -0.167194 | Cl                                                       | 1.634740  | 0.000000  | -0.197496 |
| <b><math>\text{Br}_3\text{N}</math></b>                  |           |           |           |                                                          |           |           |           |
| $E = -361.45$                                            |           |           |           |                                                          |           |           |           |
| $N_{\text{imag}} = 0$                                    |           |           |           |                                                          |           |           |           |
| N                                                        | 0.000000  | 0.000000  | 0.447775  |                                                          |           |           |           |
| Br                                                       | -0.892970 | 1.546669  | -0.217524 |                                                          |           |           |           |
| Br                                                       | -0.892970 | -1.546669 | -0.217524 |                                                          |           |           |           |
| Br                                                       | 1.785940  | 0.000000  | -0.217524 |                                                          |           |           |           |
| <b><math>\text{F}_3\text{N}\cdots\text{F}^-</math></b>   |           |           |           | <b><math>\text{Cl}_3\text{N}\cdots\text{F}^-</math></b>  |           |           |           |
| $E = -683.28$                                            |           |           |           | $E = -555.49$                                            |           |           |           |
| $N_{\text{imag}} = 0$                                    |           |           |           | $N_{\text{imag}} = 0$                                    |           |           |           |
| N                                                        | 0.268143  | -0.004918 | 0.000000  | N                                                        | 0.269408  | -0.613135 | 0.000000  |
| F                                                        | 0.361175  | 1.851683  | 0.000000  | Cl                                                       | 0.696175  | 2.601343  | 0.000000  |
| F                                                        | -0.570517 | -0.034029 | 1.043030  | Cl                                                       | -0.689932 | -0.238751 | 1.420412  |
| F                                                        | -0.570517 | -0.034029 | -1.043030 | Cl                                                       | -0.689932 | -0.238751 | -1.420412 |
| F                                                        | 0.489462  | -1.850792 | 0.000000  | F                                                        | 0.311517  | -2.028706 | 0.000000  |
| <b><math>\text{Br}_3\text{N}\cdots\text{F}^-</math></b>  |           |           |           |                                                          |           |           |           |
| $E = -528.42$                                            |           |           |           |                                                          |           |           |           |
| $N_{\text{imag}} = 0$                                    |           |           |           |                                                          |           |           |           |
| N                                                        | 0.308263  | -0.668113 | 0.000000  |                                                          |           |           |           |
| Br                                                       | 0.753228  | 2.625398  | 0.000000  |                                                          |           |           |           |
| Br                                                       | -0.767698 | -0.335662 | 1.564359  |                                                          |           |           |           |
| Br                                                       | -0.767698 | -0.335662 | -1.564359 |                                                          |           |           |           |
| F                                                        | 0.469481  | -2.070011 | 0.000000  |                                                          |           |           |           |
| <b><math>\text{F}_3\text{N}\cdots\text{Cl}^-</math></b>  |           |           |           | <b><math>\text{Cl}_3\text{N}\cdots\text{Cl}^-</math></b> |           |           |           |
| $E = -654.46$                                            |           |           |           | $E = -511.08$                                            |           |           |           |
| $N_{\text{imag}} = 0$                                    |           |           |           | $N_{\text{imag}} = 0$                                    |           |           |           |
| N                                                        | 0.144541  | 0.589364  | 0.000000  | N                                                        | 0.000000  | 0.000000  | 0.154715  |
| F                                                        | 0.167897  | 1.993453  | 0.000000  | Cl                                                       | 0.000000  | -1.411055 | -0.891502 |
| F                                                        | -0.668004 | 0.358828  | 1.048791  | Cl                                                       | 0.000000  | 1.411055  | -0.891502 |
| F                                                        | -0.668004 | 0.358828  | -1.048791 | Cl                                                       | -2.230234 | 0.000000  | 0.823562  |
| Cl                                                       | 0.749892  | -2.592666 | 0.000000  | Cl                                                       | 2.230234  | 0.000000  | 0.823562  |
| <b><math>\text{Br}_3\text{N}\cdots\text{Cl}^-</math></b> |           |           |           |                                                          |           |           |           |
| $E = -485.71$                                            |           |           |           |                                                          |           |           |           |
| $N_{\text{imag}} = 0$                                    |           |           |           |                                                          |           |           |           |
| N                                                        | 0.125159  | 0.364584  | 0.000000  |                                                          |           |           |           |
| Br                                                       | -0.902876 | -0.126707 | 1.559900  |                                                          |           |           |           |
| Br                                                       | -0.902876 | -0.126707 | -1.559900 |                                                          |           |           |           |
| Br                                                       | 0.189215  | 2.380353  | 0.000000  |                                                          |           |           |           |
| Cl                                                       | 1.480533  | -2.100209 | 0.000000  |                                                          |           |           |           |

---

**F<sub>3</sub>N···Br<sup>-</sup>****E = -645.10****N<sub>imag</sub> = 0**

|    |           |           |           |
|----|-----------|-----------|-----------|
| N  | 0.028305  | 0.929630  | 0.000000  |
| F  | 0.077148  | 2.324473  | 0.000000  |
| F  | -0.787979 | 0.707762  | 1.049194  |
| F  | -0.787979 | 0.707762  | -1.049194 |
| Br | 0.705095  | -2.487583 | 0.000000  |

**Cl<sub>3</sub>N···Br<sup>-</sup>****E = -501.99****N<sub>imag</sub> = 0**

|    |           |           |           |
|----|-----------|-----------|-----------|
| N  | 0.137218  | -0.290134 | 0.000000  |
| Cl | -0.920571 | -0.347397 | 1.426909  |
| Cl | -0.920571 | -0.347397 | -1.426909 |
| Cl | 1.046788  | -1.960939 | 0.000000  |
| Br | 0.436098  | 2.614233  | 0.000000  |

**Br<sub>3</sub>N···Br<sup>-</sup>****E = -475.97****N<sub>imag</sub> = 0**

|    |           |           |           |
|----|-----------|-----------|-----------|
| N  | 0.000000  | 0.000000  | 0.042993  |
| Br | 0.000000  | -1.583264 | -1.132542 |
| Br | 0.000000  | 1.583264  | -1.132542 |
| Br | -2.080213 | 0.000000  | 1.074513  |
| Br | 2.080213  | 0.000000  | 1.074513  |

---



**Table S5.** Cartesian coordinates, bonding energies (in kcal mol<sup>-1</sup>) and the number of imaginary vibrational frequencies ( $N_{\text{imag}}$ ) for all stationary points of  $D_2P^*$ ,  $D_3P$  and  $D_3P\cdots A^-$  structures, computed at ZORA-M06/QZ4P.

|                                      |           |           |           |                                      |           |           |           |
|--------------------------------------|-----------|-----------|-----------|--------------------------------------|-----------|-----------|-----------|
| <b><math>F_2P^*</math></b>           |           |           |           | <b><math>Cl_2P^*</math></b>          |           |           |           |
| $E = -437.52$                        |           |           |           | $E = -307.18$                        |           |           |           |
| $N_{\text{imag}} = 0$                |           |           |           | $N_{\text{imag}} = 0$                |           |           |           |
| P                                    | 0.000000  | 0.000000  | 0.449316  | P                                    | 0.000000  | 0.000000  | 0.488705  |
| F                                    | 0.000000  | 1.193696  | -0.580018 | Cl                                   | 0.000000  | 1.588518  | -0.790998 |
| F                                    | 0.000000  | -1.193696 | -0.580018 | Cl                                   | 0.000000  | -1.588518 | -0.790998 |
| <b><math>Br_2P^*</math></b>          |           |           |           |                                      |           |           |           |
| $E = -276.17$                        |           |           |           |                                      |           |           |           |
| $N_{\text{imag}} = 0$                |           |           |           |                                      |           |           |           |
| P                                    | 0.000000  | 0.000000  | 0.515621  |                                      |           |           |           |
| Br                                   | 0.000000  | 1.721490  | -0.858336 |                                      |           |           |           |
| Br                                   | 0.000000  | -1.721490 | -0.858336 |                                      |           |           |           |
| <b><math>F_3P</math></b>             |           |           |           | <b><math>Cl_3P</math></b>            |           |           |           |
| $E = -634.99$                        |           |           |           | $E = -419.72$                        |           |           |           |
| $N_{\text{imag}} = 0$                |           |           |           | $N_{\text{imag}} = 0$                |           |           |           |
| P                                    | 0.000000  | 0.000000  | 0.598083  | P                                    | 0.000000  | 0.000000  | 0.711971  |
| F                                    | -0.678515 | 1.175223  | -0.178630 | Cl                                   | -0.911235 | 1.578306  | -0.236744 |
| F                                    | -0.678515 | -1.175223 | -0.178630 | Cl                                   | -0.911235 | -1.578306 | -0.236744 |
| F                                    | 1.357030  | 0.000000  | -0.178630 | Cl                                   | 1.822470  | 0.000000  | -0.236744 |
| <b><math>Br_3P</math></b>            |           |           |           |                                      |           |           |           |
| $E = -370.81$                        |           |           |           |                                      |           |           |           |
| $N_{\text{imag}} = 0$                |           |           |           |                                      |           |           |           |
| P                                    | 0.000000  | 0.000000  | 0.773113  |                                      |           |           |           |
| Br                                   | -0.991177 | 1.716768  | -0.242240 |                                      |           |           |           |
| Br                                   | -0.991177 | -1.716768 | -0.242240 |                                      |           |           |           |
| Br                                   | 1.982353  | 0.000000  | -0.242240 |                                      |           |           |           |
| <b><math>F_3P\cdots F^-</math></b>   |           |           |           | <b><math>Cl_3P\cdots F^-</math></b>  |           |           |           |
| $E = -820.73$                        |           |           |           | $E = -623.93$                        |           |           |           |
| $N_{\text{imag}} = 0$                |           |           |           | $N_{\text{imag}} = 0$                |           |           |           |
| P                                    | 0.471584  | -0.045508 | 0.000000  | P                                    | 0.575347  | -0.103428 | 0.000000  |
| F                                    | -0.575038 | -0.004777 | -1.220655 | Cl                                   | -0.764731 | -0.261293 | 1.612478  |
| F                                    | -0.575038 | -0.004777 | 1.220655  | Cl                                   | -0.764731 | -0.261293 | -1.612478 |
| F                                    | 0.260247  | -1.786014 | 0.000000  | Cl                                   | 0.171808  | 2.492628  | 0.000000  |
| F                                    | 0.396623  | 1.706005  | 0.000000  | F                                    | 0.868878  | -1.726052 | 0.000000  |
| <b><math>Br_3P\cdots F^-</math></b>  |           |           |           |                                      |           |           |           |
| $E = -578.65$                        |           |           |           |                                      |           |           |           |
| $N_{\text{imag}} = 0$                |           |           |           |                                      |           |           |           |
| P                                    | 0.625146  | -0.161380 | 0.000000  |                                      |           |           |           |
| Br                                   | -0.819389 | -0.342368 | 1.744580  |                                      |           |           |           |
| Br                                   | -0.819389 | -0.342368 | -1.744580 |                                      |           |           |           |
| Br                                   | 0.235596  | 2.685646  | 0.000000  |                                      |           |           |           |
| F                                    | 0.976812  | -1.759796 | 0.000000  |                                      |           |           |           |
| <b><math>F_3P\cdots Cl^-</math></b>  |           |           |           | <b><math>Cl_3P\cdots Cl^-</math></b> |           |           |           |
| $E = -767.30$                        |           |           |           | $E = -561.45$                        |           |           |           |
| $N_{\text{imag}} = 0$                |           |           |           | $N_{\text{imag}} = 0$                |           |           |           |
| P                                    | 0.426576  | -0.301072 | 0.000000  | P                                    | 0.497391  | 0.133951  | 0.000000  |
| F                                    | -0.607904 | -0.213195 | -1.190925 | Cl                                   | -0.816339 | -0.139683 | 1.601529  |
| F                                    | -0.607904 | -0.213195 | 1.190925  | Cl                                   | -0.816339 | -0.139683 | -1.601529 |
| F                                    | 0.370809  | -1.947454 | 0.000000  | Cl                                   | 0.123289  | 2.474218  | 0.000000  |
| Cl                                   | 0.357187  | 2.397614  | 0.000000  | Cl                                   | 1.089662  | -2.161122 | 0.000000  |
| <b><math>Br_3P\cdots Cl^-</math></b> |           |           |           |                                      |           |           |           |
| $E = -515.57$                        |           |           |           |                                      |           |           |           |
| $N_{\text{imag}} = 0$                |           |           |           |                                      |           |           |           |
| P                                    | 0.568754  | 0.030817  | 0.000000  |                                      |           |           |           |
| Br                                   | -0.856913 | -0.245260 | 1.737601  |                                      |           |           |           |
| Br                                   | -0.856913 | -0.245260 | -1.737601 |                                      |           |           |           |
| Br                                   | 0.212939  | 2.615147  | 0.000000  |                                      |           |           |           |
| Cl                                   | 1.197970  | -2.193831 | 0.000000  |                                      |           |           |           |

---

**F<sub>3</sub>P...Br<sup>-</sup>****E = -755.35****N<sub>imag</sub> = 0**

|    |           |           |           |
|----|-----------|-----------|-----------|
| P  | 0.413389  | -0.521103 | 0.000000  |
| F  | -0.622566 | -0.471654 | -1.186509 |
| F  | -0.622566 | -0.471654 | 1.186509  |
| F  | 0.462055  | -2.151576 | 0.000000  |
| Br | 0.238774  | 2.456137  | 0.000000  |

**Cl<sub>3</sub>P...Br<sup>-</sup>****E = -547.76****N<sub>imag</sub> = 0**

|    |           |           |           |
|----|-----------|-----------|-----------|
| P  | 0.409637  | 0.319838  | 0.000000  |
| Cl | -0.898438 | 0.032750  | 1.597765  |
| Cl | -0.898438 | 0.032750  | -1.597765 |
| Cl | 0.087809  | 2.614891  | 0.000000  |
| Br | 1.089627  | -2.206932 | 0.000000  |

**Br<sub>3</sub>P...Br<sup>-</sup>****E = -501.72****N<sub>imag</sub> = 0**

|    |           |           |           |
|----|-----------|-----------|-----------|
| P  | 0.492980  | 0.160480  | 0.000000  |
| Br | -0.926680 | -0.132607 | 1.735107  |
| Br | -0.926680 | -0.132607 | -1.735107 |
| Br | 0.183894  | 2.691108  | 0.000000  |
| Br | 1.213018  | -2.285483 | 0.000000  |

---

**Table S6.** Cartesian coordinates, bonding energies (in kcal mol<sup>-1</sup>) and the number of imaginary vibrational frequencies ( $N_{\text{imag}}$ ) for all stationary points of  $D_2\text{As}^-$ ,  $D_3\text{As}$  and  $D_3\text{As}\cdots\text{A}^-$  structures, computed at ZORA-M06/QZ4P.

|                                                                                                                                                                                                                                                                                                                                                                                                                                                                                                                              |           |           |           |          |    |           |          |           |    |           |           |           |                                                                                                                                                                                                                                                                                                                                                            |           |           |           |                                                                                                                                                                                                                                                                                                                                                                                                                                     |          |           |          |                                                                                                                                                                                                                                                                                                                                                                                                                                                                                                                              |    |           |           |           |    |           |           |           |    |           |           |           |    |           |           |           |    |          |           |          |
|------------------------------------------------------------------------------------------------------------------------------------------------------------------------------------------------------------------------------------------------------------------------------------------------------------------------------------------------------------------------------------------------------------------------------------------------------------------------------------------------------------------------------|-----------|-----------|-----------|----------|----|-----------|----------|-----------|----|-----------|-----------|-----------|------------------------------------------------------------------------------------------------------------------------------------------------------------------------------------------------------------------------------------------------------------------------------------------------------------------------------------------------------------|-----------|-----------|-----------|-------------------------------------------------------------------------------------------------------------------------------------------------------------------------------------------------------------------------------------------------------------------------------------------------------------------------------------------------------------------------------------------------------------------------------------|----------|-----------|----------|------------------------------------------------------------------------------------------------------------------------------------------------------------------------------------------------------------------------------------------------------------------------------------------------------------------------------------------------------------------------------------------------------------------------------------------------------------------------------------------------------------------------------|----|-----------|-----------|-----------|----|-----------|-----------|-----------|----|-----------|-----------|-----------|----|-----------|-----------|-----------|----|----------|-----------|----------|
| <p><b><math>F_2\text{As}^-</math></b><br/> <math>E = -406.24</math><br/> <math>N_{\text{imag}} = 0</math></p> <table> <tr><td>As</td><td>0.000000</td><td>0.000000</td><td>0.523383</td></tr> <tr><td>F</td><td>0.000000</td><td>1.291015</td><td>-0.632746</td></tr> <tr><td>F</td><td>0.000000</td><td>-1.291015</td><td>-0.632746</td></tr> </table>                                                                                                                                                                      | As        | 0.000000  | 0.000000  | 0.523383 | F  | 0.000000  | 1.291015 | -0.632746 | F  | 0.000000  | -1.291015 | -0.632746 | <p><b><math>Cl_2\text{As}^-</math></b><br/> <math>E = -292.53</math><br/> <math>N_{\text{imag}} = 0</math></p> <table> <tr><td>As</td><td>0.000000</td><td>0.000000</td><td>0.549067</td></tr> <tr><td>Cl</td><td>0.000000</td><td>1.667356</td><td>-0.840659</td></tr> <tr><td>Cl</td><td>0.000000</td><td>-1.667356</td><td>-0.840659</td></tr> </table> | As        | 0.000000  | 0.000000  | 0.549067                                                                                                                                                                                                                                                                                                                                                                                                                            | Cl       | 0.000000  | 1.667356 | -0.840659                                                                                                                                                                                                                                                                                                                                                                                                                                                                                                                    | Cl | 0.000000  | -1.667356 | -0.840659 |    |           |           |           |    |           |           |           |    |           |           |           |    |          |           |          |
| As                                                                                                                                                                                                                                                                                                                                                                                                                                                                                                                           | 0.000000  | 0.000000  | 0.523383  |          |    |           |          |           |    |           |           |           |                                                                                                                                                                                                                                                                                                                                                            |           |           |           |                                                                                                                                                                                                                                                                                                                                                                                                                                     |          |           |          |                                                                                                                                                                                                                                                                                                                                                                                                                                                                                                                              |    |           |           |           |    |           |           |           |    |           |           |           |    |           |           |           |    |          |           |          |
| F                                                                                                                                                                                                                                                                                                                                                                                                                                                                                                                            | 0.000000  | 1.291015  | -0.632746 |          |    |           |          |           |    |           |           |           |                                                                                                                                                                                                                                                                                                                                                            |           |           |           |                                                                                                                                                                                                                                                                                                                                                                                                                                     |          |           |          |                                                                                                                                                                                                                                                                                                                                                                                                                                                                                                                              |    |           |           |           |    |           |           |           |    |           |           |           |    |           |           |           |    |          |           |          |
| F                                                                                                                                                                                                                                                                                                                                                                                                                                                                                                                            | 0.000000  | -1.291015 | -0.632746 |          |    |           |          |           |    |           |           |           |                                                                                                                                                                                                                                                                                                                                                            |           |           |           |                                                                                                                                                                                                                                                                                                                                                                                                                                     |          |           |          |                                                                                                                                                                                                                                                                                                                                                                                                                                                                                                                              |    |           |           |           |    |           |           |           |    |           |           |           |    |           |           |           |    |          |           |          |
| As                                                                                                                                                                                                                                                                                                                                                                                                                                                                                                                           | 0.000000  | 0.000000  | 0.549067  |          |    |           |          |           |    |           |           |           |                                                                                                                                                                                                                                                                                                                                                            |           |           |           |                                                                                                                                                                                                                                                                                                                                                                                                                                     |          |           |          |                                                                                                                                                                                                                                                                                                                                                                                                                                                                                                                              |    |           |           |           |    |           |           |           |    |           |           |           |    |           |           |           |    |          |           |          |
| Cl                                                                                                                                                                                                                                                                                                                                                                                                                                                                                                                           | 0.000000  | 1.667356  | -0.840659 |          |    |           |          |           |    |           |           |           |                                                                                                                                                                                                                                                                                                                                                            |           |           |           |                                                                                                                                                                                                                                                                                                                                                                                                                                     |          |           |          |                                                                                                                                                                                                                                                                                                                                                                                                                                                                                                                              |    |           |           |           |    |           |           |           |    |           |           |           |    |           |           |           |    |          |           |          |
| Cl                                                                                                                                                                                                                                                                                                                                                                                                                                                                                                                           | 0.000000  | -1.667356 | -0.840659 |          |    |           |          |           |    |           |           |           |                                                                                                                                                                                                                                                                                                                                                            |           |           |           |                                                                                                                                                                                                                                                                                                                                                                                                                                     |          |           |          |                                                                                                                                                                                                                                                                                                                                                                                                                                                                                                                              |    |           |           |           |    |           |           |           |    |           |           |           |    |           |           |           |    |          |           |          |
| <p><b><math>Br_2\text{As}^-</math></b><br/> <math>E = -264.06</math><br/> <math>N_{\text{imag}} = 0</math></p> <table> <tr><td>As</td><td>0.000000</td><td>0.000000</td><td>0.580135</td></tr> <tr><td>Br</td><td>0.000000</td><td>1.795809</td><td>-0.896786</td></tr> <tr><td>Br</td><td>0.000000</td><td>-1.795809</td><td>-0.896786</td></tr> </table>                                                                                                                                                                   | As        | 0.000000  | 0.000000  | 0.580135 | Br | 0.000000  | 1.795809 | -0.896786 | Br | 0.000000  | -1.795809 | -0.896786 |                                                                                                                                                                                                                                                                                                                                                            |           |           |           |                                                                                                                                                                                                                                                                                                                                                                                                                                     |          |           |          |                                                                                                                                                                                                                                                                                                                                                                                                                                                                                                                              |    |           |           |           |    |           |           |           |    |           |           |           |    |           |           |           |    |          |           |          |
| As                                                                                                                                                                                                                                                                                                                                                                                                                                                                                                                           | 0.000000  | 0.000000  | 0.580135  |          |    |           |          |           |    |           |           |           |                                                                                                                                                                                                                                                                                                                                                            |           |           |           |                                                                                                                                                                                                                                                                                                                                                                                                                                     |          |           |          |                                                                                                                                                                                                                                                                                                                                                                                                                                                                                                                              |    |           |           |           |    |           |           |           |    |           |           |           |    |           |           |           |    |          |           |          |
| Br                                                                                                                                                                                                                                                                                                                                                                                                                                                                                                                           | 0.000000  | 1.795809  | -0.896786 |          |    |           |          |           |    |           |           |           |                                                                                                                                                                                                                                                                                                                                                            |           |           |           |                                                                                                                                                                                                                                                                                                                                                                                                                                     |          |           |          |                                                                                                                                                                                                                                                                                                                                                                                                                                                                                                                              |    |           |           |           |    |           |           |           |    |           |           |           |    |           |           |           |    |          |           |          |
| Br                                                                                                                                                                                                                                                                                                                                                                                                                                                                                                                           | 0.000000  | -1.795809 | -0.896786 |          |    |           |          |           |    |           |           |           |                                                                                                                                                                                                                                                                                                                                                            |           |           |           |                                                                                                                                                                                                                                                                                                                                                                                                                                     |          |           |          |                                                                                                                                                                                                                                                                                                                                                                                                                                                                                                                              |    |           |           |           |    |           |           |           |    |           |           |           |    |           |           |           |    |          |           |          |
| <p><b><math>F_3\text{As}</math></b><br/> <math>E = -586.52</math><br/> <math>N_{\text{imag}} = 0</math></p> <table> <tr><td>As</td><td>0.000000</td><td>0.000000</td><td>0.678088</td></tr> <tr><td>F</td><td>-0.735339</td><td>1.273644</td><td>-0.207718</td></tr> <tr><td>F</td><td>-0.735339</td><td>-1.273644</td><td>-0.207718</td></tr> <tr><td>F</td><td>1.470677</td><td>0.000000</td><td>-0.207718</td></tr> </table>                                                                                              | As        | 0.000000  | 0.000000  | 0.678088 | F  | -0.735339 | 1.273644 | -0.207718 | F  | -0.735339 | -1.273644 | -0.207718 | F                                                                                                                                                                                                                                                                                                                                                          | 1.470677  | 0.000000  | -0.207718 | <p><b><math>Cl_3\text{As}</math></b><br/> <math>E = -402.48</math><br/> <math>N_{\text{imag}} = 0</math></p> <table> <tr><td>As</td><td>0.000000</td><td>0.000000</td><td>0.761728</td></tr> <tr><td>Cl</td><td>-0.957050</td><td>1.657659</td><td>-0.278656</td></tr> <tr><td>Cl</td><td>-0.957050</td><td>-1.657659</td><td>-0.278656</td></tr> <tr><td>Cl</td><td>1.914100</td><td>0.000000</td><td>-0.278656</td></tr> </table> | As       | 0.000000  | 0.000000 | 0.761728                                                                                                                                                                                                                                                                                                                                                                                                                                                                                                                     | Cl | -0.957050 | 1.657659  | -0.278656 | Cl | -0.957050 | -1.657659 | -0.278656 | Cl | 1.914100  | 0.000000  | -0.278656 |    |           |           |           |    |          |           |          |
| As                                                                                                                                                                                                                                                                                                                                                                                                                                                                                                                           | 0.000000  | 0.000000  | 0.678088  |          |    |           |          |           |    |           |           |           |                                                                                                                                                                                                                                                                                                                                                            |           |           |           |                                                                                                                                                                                                                                                                                                                                                                                                                                     |          |           |          |                                                                                                                                                                                                                                                                                                                                                                                                                                                                                                                              |    |           |           |           |    |           |           |           |    |           |           |           |    |           |           |           |    |          |           |          |
| F                                                                                                                                                                                                                                                                                                                                                                                                                                                                                                                            | -0.735339 | 1.273644  | -0.207718 |          |    |           |          |           |    |           |           |           |                                                                                                                                                                                                                                                                                                                                                            |           |           |           |                                                                                                                                                                                                                                                                                                                                                                                                                                     |          |           |          |                                                                                                                                                                                                                                                                                                                                                                                                                                                                                                                              |    |           |           |           |    |           |           |           |    |           |           |           |    |           |           |           |    |          |           |          |
| F                                                                                                                                                                                                                                                                                                                                                                                                                                                                                                                            | -0.735339 | -1.273644 | -0.207718 |          |    |           |          |           |    |           |           |           |                                                                                                                                                                                                                                                                                                                                                            |           |           |           |                                                                                                                                                                                                                                                                                                                                                                                                                                     |          |           |          |                                                                                                                                                                                                                                                                                                                                                                                                                                                                                                                              |    |           |           |           |    |           |           |           |    |           |           |           |    |           |           |           |    |          |           |          |
| F                                                                                                                                                                                                                                                                                                                                                                                                                                                                                                                            | 1.470677  | 0.000000  | -0.207718 |          |    |           |          |           |    |           |           |           |                                                                                                                                                                                                                                                                                                                                                            |           |           |           |                                                                                                                                                                                                                                                                                                                                                                                                                                     |          |           |          |                                                                                                                                                                                                                                                                                                                                                                                                                                                                                                                              |    |           |           |           |    |           |           |           |    |           |           |           |    |           |           |           |    |          |           |          |
| As                                                                                                                                                                                                                                                                                                                                                                                                                                                                                                                           | 0.000000  | 0.000000  | 0.761728  |          |    |           |          |           |    |           |           |           |                                                                                                                                                                                                                                                                                                                                                            |           |           |           |                                                                                                                                                                                                                                                                                                                                                                                                                                     |          |           |          |                                                                                                                                                                                                                                                                                                                                                                                                                                                                                                                              |    |           |           |           |    |           |           |           |    |           |           |           |    |           |           |           |    |          |           |          |
| Cl                                                                                                                                                                                                                                                                                                                                                                                                                                                                                                                           | -0.957050 | 1.657659  | -0.278656 |          |    |           |          |           |    |           |           |           |                                                                                                                                                                                                                                                                                                                                                            |           |           |           |                                                                                                                                                                                                                                                                                                                                                                                                                                     |          |           |          |                                                                                                                                                                                                                                                                                                                                                                                                                                                                                                                              |    |           |           |           |    |           |           |           |    |           |           |           |    |           |           |           |    |          |           |          |
| Cl                                                                                                                                                                                                                                                                                                                                                                                                                                                                                                                           | -0.957050 | -1.657659 | -0.278656 |          |    |           |          |           |    |           |           |           |                                                                                                                                                                                                                                                                                                                                                            |           |           |           |                                                                                                                                                                                                                                                                                                                                                                                                                                     |          |           |          |                                                                                                                                                                                                                                                                                                                                                                                                                                                                                                                              |    |           |           |           |    |           |           |           |    |           |           |           |    |           |           |           |    |          |           |          |
| Cl                                                                                                                                                                                                                                                                                                                                                                                                                                                                                                                           | 1.914100  | 0.000000  | -0.278656 |          |    |           |          |           |    |           |           |           |                                                                                                                                                                                                                                                                                                                                                            |           |           |           |                                                                                                                                                                                                                                                                                                                                                                                                                                     |          |           |          |                                                                                                                                                                                                                                                                                                                                                                                                                                                                                                                              |    |           |           |           |    |           |           |           |    |           |           |           |    |           |           |           |    |          |           |          |
| <p><b><math>Br_3\text{As}</math></b><br/> <math>E = -357.61</math><br/> <math>N_{\text{imag}} = 0</math></p> <table> <tr><td>As</td><td>0.000000</td><td>0.000000</td><td>0.826786</td></tr> <tr><td>Br</td><td>-1.034028</td><td>1.790990</td><td>-0.273400</td></tr> <tr><td>Br</td><td>-1.034028</td><td>-1.790990</td><td>-0.273400</td></tr> <tr><td>Br</td><td>2.068057</td><td>0.000000</td><td>-0.273400</td></tr> </table>                                                                                          | As        | 0.000000  | 0.000000  | 0.826786 | Br | -1.034028 | 1.790990 | -0.273400 | Br | -1.034028 | -1.790990 | -0.273400 | Br                                                                                                                                                                                                                                                                                                                                                         | 2.068057  | 0.000000  | -0.273400 |                                                                                                                                                                                                                                                                                                                                                                                                                                     |          |           |          |                                                                                                                                                                                                                                                                                                                                                                                                                                                                                                                              |    |           |           |           |    |           |           |           |    |           |           |           |    |           |           |           |    |          |           |          |
| As                                                                                                                                                                                                                                                                                                                                                                                                                                                                                                                           | 0.000000  | 0.000000  | 0.826786  |          |    |           |          |           |    |           |           |           |                                                                                                                                                                                                                                                                                                                                                            |           |           |           |                                                                                                                                                                                                                                                                                                                                                                                                                                     |          |           |          |                                                                                                                                                                                                                                                                                                                                                                                                                                                                                                                              |    |           |           |           |    |           |           |           |    |           |           |           |    |           |           |           |    |          |           |          |
| Br                                                                                                                                                                                                                                                                                                                                                                                                                                                                                                                           | -1.034028 | 1.790990  | -0.273400 |          |    |           |          |           |    |           |           |           |                                                                                                                                                                                                                                                                                                                                                            |           |           |           |                                                                                                                                                                                                                                                                                                                                                                                                                                     |          |           |          |                                                                                                                                                                                                                                                                                                                                                                                                                                                                                                                              |    |           |           |           |    |           |           |           |    |           |           |           |    |           |           |           |    |          |           |          |
| Br                                                                                                                                                                                                                                                                                                                                                                                                                                                                                                                           | -1.034028 | -1.790990 | -0.273400 |          |    |           |          |           |    |           |           |           |                                                                                                                                                                                                                                                                                                                                                            |           |           |           |                                                                                                                                                                                                                                                                                                                                                                                                                                     |          |           |          |                                                                                                                                                                                                                                                                                                                                                                                                                                                                                                                              |    |           |           |           |    |           |           |           |    |           |           |           |    |           |           |           |    |          |           |          |
| Br                                                                                                                                                                                                                                                                                                                                                                                                                                                                                                                           | 2.068057  | 0.000000  | -0.273400 |          |    |           |          |           |    |           |           |           |                                                                                                                                                                                                                                                                                                                                                            |           |           |           |                                                                                                                                                                                                                                                                                                                                                                                                                                     |          |           |          |                                                                                                                                                                                                                                                                                                                                                                                                                                                                                                                              |    |           |           |           |    |           |           |           |    |           |           |           |    |           |           |           |    |          |           |          |
| <p><b><math>F_3\text{As}\cdots\text{F}^-</math></b><br/> <math>E = -784.31</math><br/> <math>N_{\text{imag}} = 0</math></p> <table> <tr><td>As</td><td>0.519932</td><td>0.140398</td><td>0.000000</td></tr> <tr><td>F</td><td>0.137352</td><td>2.001938</td><td>0.000000</td></tr> <tr><td>F</td><td>-0.632615</td><td>-0.006025</td><td>1.317394</td></tr> <tr><td>F</td><td>-0.632615</td><td>-0.006025</td><td>-1.317394</td></tr> <tr><td>F</td><td>0.616005</td><td>-1.757348</td><td>0.000000</td></tr> </table>       | As        | 0.519932  | 0.140398  | 0.000000 | F  | 0.137352  | 2.001938 | 0.000000  | F  | -0.632615 | -0.006025 | 1.317394  | F                                                                                                                                                                                                                                                                                                                                                          | -0.632615 | -0.006025 | -1.317394 | F                                                                                                                                                                                                                                                                                                                                                                                                                                   | 0.616005 | -1.757348 | 0.000000 | <p><b><math>Cl_3\text{As}\cdots\text{F}^-</math></b><br/> <math>E = -609.25</math><br/> <math>N_{\text{imag}} = 0</math></p> <table> <tr><td>As</td><td>0.594428</td><td>0.012026</td><td>0.000000</td></tr> <tr><td>Cl</td><td>0.276405</td><td>2.577110</td><td>0.000000</td></tr> <tr><td>Cl</td><td>-0.837011</td><td>-0.229511</td><td>1.691083</td></tr> <tr><td>Cl</td><td>-0.837011</td><td>-0.229511</td><td>-1.691083</td></tr> <tr><td>F</td><td>0.958406</td><td>-1.802055</td><td>0.000000</td></tr> </table>   | As | 0.594428  | 0.012026  | 0.000000  | Cl | 0.276405  | 2.577110  | 0.000000  | Cl | -0.837011 | -0.229511 | 1.691083  | Cl | -0.837011 | -0.229511 | -1.691083 | F  | 0.958406 | -1.802055 | 0.000000 |
| As                                                                                                                                                                                                                                                                                                                                                                                                                                                                                                                           | 0.519932  | 0.140398  | 0.000000  |          |    |           |          |           |    |           |           |           |                                                                                                                                                                                                                                                                                                                                                            |           |           |           |                                                                                                                                                                                                                                                                                                                                                                                                                                     |          |           |          |                                                                                                                                                                                                                                                                                                                                                                                                                                                                                                                              |    |           |           |           |    |           |           |           |    |           |           |           |    |           |           |           |    |          |           |          |
| F                                                                                                                                                                                                                                                                                                                                                                                                                                                                                                                            | 0.137352  | 2.001938  | 0.000000  |          |    |           |          |           |    |           |           |           |                                                                                                                                                                                                                                                                                                                                                            |           |           |           |                                                                                                                                                                                                                                                                                                                                                                                                                                     |          |           |          |                                                                                                                                                                                                                                                                                                                                                                                                                                                                                                                              |    |           |           |           |    |           |           |           |    |           |           |           |    |           |           |           |    |          |           |          |
| F                                                                                                                                                                                                                                                                                                                                                                                                                                                                                                                            | -0.632615 | -0.006025 | 1.317394  |          |    |           |          |           |    |           |           |           |                                                                                                                                                                                                                                                                                                                                                            |           |           |           |                                                                                                                                                                                                                                                                                                                                                                                                                                     |          |           |          |                                                                                                                                                                                                                                                                                                                                                                                                                                                                                                                              |    |           |           |           |    |           |           |           |    |           |           |           |    |           |           |           |    |          |           |          |
| F                                                                                                                                                                                                                                                                                                                                                                                                                                                                                                                            | -0.632615 | -0.006025 | -1.317394 |          |    |           |          |           |    |           |           |           |                                                                                                                                                                                                                                                                                                                                                            |           |           |           |                                                                                                                                                                                                                                                                                                                                                                                                                                     |          |           |          |                                                                                                                                                                                                                                                                                                                                                                                                                                                                                                                              |    |           |           |           |    |           |           |           |    |           |           |           |    |           |           |           |    |          |           |          |
| F                                                                                                                                                                                                                                                                                                                                                                                                                                                                                                                            | 0.616005  | -1.757348 | 0.000000  |          |    |           |          |           |    |           |           |           |                                                                                                                                                                                                                                                                                                                                                            |           |           |           |                                                                                                                                                                                                                                                                                                                                                                                                                                     |          |           |          |                                                                                                                                                                                                                                                                                                                                                                                                                                                                                                                              |    |           |           |           |    |           |           |           |    |           |           |           |    |           |           |           |    |          |           |          |
| As                                                                                                                                                                                                                                                                                                                                                                                                                                                                                                                           | 0.594428  | 0.012026  | 0.000000  |          |    |           |          |           |    |           |           |           |                                                                                                                                                                                                                                                                                                                                                            |           |           |           |                                                                                                                                                                                                                                                                                                                                                                                                                                     |          |           |          |                                                                                                                                                                                                                                                                                                                                                                                                                                                                                                                              |    |           |           |           |    |           |           |           |    |           |           |           |    |           |           |           |    |          |           |          |
| Cl                                                                                                                                                                                                                                                                                                                                                                                                                                                                                                                           | 0.276405  | 2.577110  | 0.000000  |          |    |           |          |           |    |           |           |           |                                                                                                                                                                                                                                                                                                                                                            |           |           |           |                                                                                                                                                                                                                                                                                                                                                                                                                                     |          |           |          |                                                                                                                                                                                                                                                                                                                                                                                                                                                                                                                              |    |           |           |           |    |           |           |           |    |           |           |           |    |           |           |           |    |          |           |          |
| Cl                                                                                                                                                                                                                                                                                                                                                                                                                                                                                                                           | -0.837011 | -0.229511 | 1.691083  |          |    |           |          |           |    |           |           |           |                                                                                                                                                                                                                                                                                                                                                            |           |           |           |                                                                                                                                                                                                                                                                                                                                                                                                                                     |          |           |          |                                                                                                                                                                                                                                                                                                                                                                                                                                                                                                                              |    |           |           |           |    |           |           |           |    |           |           |           |    |           |           |           |    |          |           |          |
| Cl                                                                                                                                                                                                                                                                                                                                                                                                                                                                                                                           | -0.837011 | -0.229511 | -1.691083 |          |    |           |          |           |    |           |           |           |                                                                                                                                                                                                                                                                                                                                                            |           |           |           |                                                                                                                                                                                                                                                                                                                                                                                                                                     |          |           |          |                                                                                                                                                                                                                                                                                                                                                                                                                                                                                                                              |    |           |           |           |    |           |           |           |    |           |           |           |    |           |           |           |    |          |           |          |
| F                                                                                                                                                                                                                                                                                                                                                                                                                                                                                                                            | 0.958406  | -1.802055 | 0.000000  |          |    |           |          |           |    |           |           |           |                                                                                                                                                                                                                                                                                                                                                            |           |           |           |                                                                                                                                                                                                                                                                                                                                                                                                                                     |          |           |          |                                                                                                                                                                                                                                                                                                                                                                                                                                                                                                                              |    |           |           |           |    |           |           |           |    |           |           |           |    |           |           |           |    |          |           |          |
| <p><b><math>Br_3\text{As}\cdots\text{F}^-</math></b><br/> <math>E = -565.91</math><br/> <math>N_{\text{imag}} = 0</math></p> <table> <tr><td>As</td><td>0.703181</td><td>-0.051608</td><td>0.000000</td></tr> <tr><td>Br</td><td>0.295178</td><td>2.707101</td><td>0.000000</td></tr> <tr><td>Br</td><td>-0.808690</td><td>-0.402281</td><td>1.819102</td></tr> <tr><td>Br</td><td>-0.808690</td><td>-0.402281</td><td>-1.819102</td></tr> <tr><td>F</td><td>1.224672</td><td>-1.819117</td><td>0.000000</td></tr> </table>  | As        | 0.703181  | -0.051608 | 0.000000 | Br | 0.295178  | 2.707101 | 0.000000  | Br | -0.808690 | -0.402281 | 1.819102  | Br                                                                                                                                                                                                                                                                                                                                                         | -0.808690 | -0.402281 | -1.819102 | F                                                                                                                                                                                                                                                                                                                                                                                                                                   | 1.224672 | -1.819117 | 0.000000 |                                                                                                                                                                                                                                                                                                                                                                                                                                                                                                                              |    |           |           |           |    |           |           |           |    |           |           |           |    |           |           |           |    |          |           |          |
| As                                                                                                                                                                                                                                                                                                                                                                                                                                                                                                                           | 0.703181  | -0.051608 | 0.000000  |          |    |           |          |           |    |           |           |           |                                                                                                                                                                                                                                                                                                                                                            |           |           |           |                                                                                                                                                                                                                                                                                                                                                                                                                                     |          |           |          |                                                                                                                                                                                                                                                                                                                                                                                                                                                                                                                              |    |           |           |           |    |           |           |           |    |           |           |           |    |           |           |           |    |          |           |          |
| Br                                                                                                                                                                                                                                                                                                                                                                                                                                                                                                                           | 0.295178  | 2.707101  | 0.000000  |          |    |           |          |           |    |           |           |           |                                                                                                                                                                                                                                                                                                                                                            |           |           |           |                                                                                                                                                                                                                                                                                                                                                                                                                                     |          |           |          |                                                                                                                                                                                                                                                                                                                                                                                                                                                                                                                              |    |           |           |           |    |           |           |           |    |           |           |           |    |           |           |           |    |          |           |          |
| Br                                                                                                                                                                                                                                                                                                                                                                                                                                                                                                                           | -0.808690 | -0.402281 | 1.819102  |          |    |           |          |           |    |           |           |           |                                                                                                                                                                                                                                                                                                                                                            |           |           |           |                                                                                                                                                                                                                                                                                                                                                                                                                                     |          |           |          |                                                                                                                                                                                                                                                                                                                                                                                                                                                                                                                              |    |           |           |           |    |           |           |           |    |           |           |           |    |           |           |           |    |          |           |          |
| Br                                                                                                                                                                                                                                                                                                                                                                                                                                                                                                                           | -0.808690 | -0.402281 | -1.819102 |          |    |           |          |           |    |           |           |           |                                                                                                                                                                                                                                                                                                                                                            |           |           |           |                                                                                                                                                                                                                                                                                                                                                                                                                                     |          |           |          |                                                                                                                                                                                                                                                                                                                                                                                                                                                                                                                              |    |           |           |           |    |           |           |           |    |           |           |           |    |           |           |           |    |          |           |          |
| F                                                                                                                                                                                                                                                                                                                                                                                                                                                                                                                            | 1.224672  | -1.819117 | 0.000000  |          |    |           |          |           |    |           |           |           |                                                                                                                                                                                                                                                                                                                                                            |           |           |           |                                                                                                                                                                                                                                                                                                                                                                                                                                     |          |           |          |                                                                                                                                                                                                                                                                                                                                                                                                                                                                                                                              |    |           |           |           |    |           |           |           |    |           |           |           |    |           |           |           |    |          |           |          |
| <p><b><math>F_3\text{As}\cdots\text{Cl}^-</math></b><br/> <math>E = -731.50</math><br/> <math>N_{\text{imag}} = 0</math></p> <table> <tr><td>As</td><td>0.459413</td><td>0.275542</td><td>0.000000</td></tr> <tr><td>F</td><td>0.217951</td><td>2.095210</td><td>0.000000</td></tr> <tr><td>F</td><td>-0.700949</td><td>0.135775</td><td>1.294282</td></tr> <tr><td>F</td><td>-0.700949</td><td>0.135775</td><td>-1.294282</td></tr> <tr><td>Cl</td><td>0.695304</td><td>-2.308704</td><td>0.000000</td></tr> </table>       | As        | 0.459413  | 0.275542  | 0.000000 | F  | 0.217951  | 2.095210 | 0.000000  | F  | -0.700949 | 0.135775  | 1.294282  | F                                                                                                                                                                                                                                                                                                                                                          | -0.700949 | 0.135775  | -1.294282 | Cl                                                                                                                                                                                                                                                                                                                                                                                                                                  | 0.695304 | -2.308704 | 0.000000 | <p><b><math>Cl_3\text{As}\cdots\text{Cl}^-</math></b><br/> <math>E = -553.88</math><br/> <math>N_{\text{imag}} = 0</math></p> <table> <tr><td>As</td><td>0.529968</td><td>0.132065</td><td>0.000000</td></tr> <tr><td>Cl</td><td>0.280301</td><td>2.584045</td><td>0.000000</td></tr> <tr><td>Cl</td><td>-0.898392</td><td>-0.144841</td><td>1.680286</td></tr> <tr><td>Cl</td><td>-0.898392</td><td>-0.144841</td><td>-1.680286</td></tr> <tr><td>Cl</td><td>1.215379</td><td>-2.235517</td><td>0.000000</td></tr> </table> | As | 0.529968  | 0.132065  | 0.000000  | Cl | 0.280301  | 2.584045  | 0.000000  | Cl | -0.898392 | -0.144841 | 1.680286  | Cl | -0.898392 | -0.144841 | -1.680286 | Cl | 1.215379 | -2.235517 | 0.000000 |
| As                                                                                                                                                                                                                                                                                                                                                                                                                                                                                                                           | 0.459413  | 0.275542  | 0.000000  |          |    |           |          |           |    |           |           |           |                                                                                                                                                                                                                                                                                                                                                            |           |           |           |                                                                                                                                                                                                                                                                                                                                                                                                                                     |          |           |          |                                                                                                                                                                                                                                                                                                                                                                                                                                                                                                                              |    |           |           |           |    |           |           |           |    |           |           |           |    |           |           |           |    |          |           |          |
| F                                                                                                                                                                                                                                                                                                                                                                                                                                                                                                                            | 0.217951  | 2.095210  | 0.000000  |          |    |           |          |           |    |           |           |           |                                                                                                                                                                                                                                                                                                                                                            |           |           |           |                                                                                                                                                                                                                                                                                                                                                                                                                                     |          |           |          |                                                                                                                                                                                                                                                                                                                                                                                                                                                                                                                              |    |           |           |           |    |           |           |           |    |           |           |           |    |           |           |           |    |          |           |          |
| F                                                                                                                                                                                                                                                                                                                                                                                                                                                                                                                            | -0.700949 | 0.135775  | 1.294282  |          |    |           |          |           |    |           |           |           |                                                                                                                                                                                                                                                                                                                                                            |           |           |           |                                                                                                                                                                                                                                                                                                                                                                                                                                     |          |           |          |                                                                                                                                                                                                                                                                                                                                                                                                                                                                                                                              |    |           |           |           |    |           |           |           |    |           |           |           |    |           |           |           |    |          |           |          |
| F                                                                                                                                                                                                                                                                                                                                                                                                                                                                                                                            | -0.700949 | 0.135775  | -1.294282 |          |    |           |          |           |    |           |           |           |                                                                                                                                                                                                                                                                                                                                                            |           |           |           |                                                                                                                                                                                                                                                                                                                                                                                                                                     |          |           |          |                                                                                                                                                                                                                                                                                                                                                                                                                                                                                                                              |    |           |           |           |    |           |           |           |    |           |           |           |    |           |           |           |    |          |           |          |
| Cl                                                                                                                                                                                                                                                                                                                                                                                                                                                                                                                           | 0.695304  | -2.308704 | 0.000000  |          |    |           |          |           |    |           |           |           |                                                                                                                                                                                                                                                                                                                                                            |           |           |           |                                                                                                                                                                                                                                                                                                                                                                                                                                     |          |           |          |                                                                                                                                                                                                                                                                                                                                                                                                                                                                                                                              |    |           |           |           |    |           |           |           |    |           |           |           |    |           |           |           |    |          |           |          |
| As                                                                                                                                                                                                                                                                                                                                                                                                                                                                                                                           | 0.529968  | 0.132065  | 0.000000  |          |    |           |          |           |    |           |           |           |                                                                                                                                                                                                                                                                                                                                                            |           |           |           |                                                                                                                                                                                                                                                                                                                                                                                                                                     |          |           |          |                                                                                                                                                                                                                                                                                                                                                                                                                                                                                                                              |    |           |           |           |    |           |           |           |    |           |           |           |    |           |           |           |    |          |           |          |
| Cl                                                                                                                                                                                                                                                                                                                                                                                                                                                                                                                           | 0.280301  | 2.584045  | 0.000000  |          |    |           |          |           |    |           |           |           |                                                                                                                                                                                                                                                                                                                                                            |           |           |           |                                                                                                                                                                                                                                                                                                                                                                                                                                     |          |           |          |                                                                                                                                                                                                                                                                                                                                                                                                                                                                                                                              |    |           |           |           |    |           |           |           |    |           |           |           |    |           |           |           |    |          |           |          |
| Cl                                                                                                                                                                                                                                                                                                                                                                                                                                                                                                                           | -0.898392 | -0.144841 | 1.680286  |          |    |           |          |           |    |           |           |           |                                                                                                                                                                                                                                                                                                                                                            |           |           |           |                                                                                                                                                                                                                                                                                                                                                                                                                                     |          |           |          |                                                                                                                                                                                                                                                                                                                                                                                                                                                                                                                              |    |           |           |           |    |           |           |           |    |           |           |           |    |           |           |           |    |          |           |          |
| Cl                                                                                                                                                                                                                                                                                                                                                                                                                                                                                                                           | -0.898392 | -0.144841 | -1.680286 |          |    |           |          |           |    |           |           |           |                                                                                                                                                                                                                                                                                                                                                            |           |           |           |                                                                                                                                                                                                                                                                                                                                                                                                                                     |          |           |          |                                                                                                                                                                                                                                                                                                                                                                                                                                                                                                                              |    |           |           |           |    |           |           |           |    |           |           |           |    |           |           |           |    |          |           |          |
| Cl                                                                                                                                                                                                                                                                                                                                                                                                                                                                                                                           | 1.215379  | -2.235517 | 0.000000  |          |    |           |          |           |    |           |           |           |                                                                                                                                                                                                                                                                                                                                                            |           |           |           |                                                                                                                                                                                                                                                                                                                                                                                                                                     |          |           |          |                                                                                                                                                                                                                                                                                                                                                                                                                                                                                                                              |    |           |           |           |    |           |           |           |    |           |           |           |    |           |           |           |    |          |           |          |
| <p><b><math>Br_3\text{As}\cdots\text{Cl}^-</math></b><br/> <math>E = -510.10</math><br/> <math>N_{\text{imag}} = 0</math></p> <table> <tr><td>As</td><td>0.649394</td><td>0.048438</td><td>0.000000</td></tr> <tr><td>Br</td><td>0.289716</td><td>2.686734</td><td>0.000000</td></tr> <tr><td>Br</td><td>-0.855424</td><td>-0.352654</td><td>1.811488</td></tr> <tr><td>Br</td><td>-0.855424</td><td>-0.352654</td><td>-1.811488</td></tr> <tr><td>Cl</td><td>1.563182</td><td>-2.211500</td><td>0.000000</td></tr> </table> | As        | 0.649394  | 0.048438  | 0.000000 | Br | 0.289716  | 2.686734 | 0.000000  | Br | -0.855424 | -0.352654 | 1.811488  | Br                                                                                                                                                                                                                                                                                                                                                         | -0.855424 | -0.352654 | -1.811488 | Cl                                                                                                                                                                                                                                                                                                                                                                                                                                  | 1.563182 | -2.211500 | 0.000000 |                                                                                                                                                                                                                                                                                                                                                                                                                                                                                                                              |    |           |           |           |    |           |           |           |    |           |           |           |    |           |           |           |    |          |           |          |
| As                                                                                                                                                                                                                                                                                                                                                                                                                                                                                                                           | 0.649394  | 0.048438  | 0.000000  |          |    |           |          |           |    |           |           |           |                                                                                                                                                                                                                                                                                                                                                            |           |           |           |                                                                                                                                                                                                                                                                                                                                                                                                                                     |          |           |          |                                                                                                                                                                                                                                                                                                                                                                                                                                                                                                                              |    |           |           |           |    |           |           |           |    |           |           |           |    |           |           |           |    |          |           |          |
| Br                                                                                                                                                                                                                                                                                                                                                                                                                                                                                                                           | 0.289716  | 2.686734  | 0.000000  |          |    |           |          |           |    |           |           |           |                                                                                                                                                                                                                                                                                                                                                            |           |           |           |                                                                                                                                                                                                                                                                                                                                                                                                                                     |          |           |          |                                                                                                                                                                                                                                                                                                                                                                                                                                                                                                                              |    |           |           |           |    |           |           |           |    |           |           |           |    |           |           |           |    |          |           |          |
| Br                                                                                                                                                                                                                                                                                                                                                                                                                                                                                                                           | -0.855424 | -0.352654 | 1.811488  |          |    |           |          |           |    |           |           |           |                                                                                                                                                                                                                                                                                                                                                            |           |           |           |                                                                                                                                                                                                                                                                                                                                                                                                                                     |          |           |          |                                                                                                                                                                                                                                                                                                                                                                                                                                                                                                                              |    |           |           |           |    |           |           |           |    |           |           |           |    |           |           |           |    |          |           |          |
| Br                                                                                                                                                                                                                                                                                                                                                                                                                                                                                                                           | -0.855424 | -0.352654 | -1.811488 |          |    |           |          |           |    |           |           |           |                                                                                                                                                                                                                                                                                                                                                            |           |           |           |                                                                                                                                                                                                                                                                                                                                                                                                                                     |          |           |          |                                                                                                                                                                                                                                                                                                                                                                                                                                                                                                                              |    |           |           |           |    |           |           |           |    |           |           |           |    |           |           |           |    |          |           |          |
| Cl                                                                                                                                                                                                                                                                                                                                                                                                                                                                                                                           | 1.563182  | -2.211500 | 0.000000  |          |    |           |          |           |    |           |           |           |                                                                                                                                                                                                                                                                                                                                                            |           |           |           |                                                                                                                                                                                                                                                                                                                                                                                                                                     |          |           |          |                                                                                                                                                                                                                                                                                                                                                                                                                                                                                                                              |    |           |           |           |    |           |           |           |    |           |           |           |    |           |           |           |    |          |           |          |

---

**F<sub>3</sub>As···Br<sup>-</sup>****E = -718.19****N<sub>imag</sub> = 0**

|    |           |           |           |
|----|-----------|-----------|-----------|
| As | 0.424334  | 0.440561  | 0.000000  |
| F  | 0.310043  | 2.257349  | 0.000000  |
| F  | -0.741888 | 0.360472  | 1.290175  |
| F  | -0.741888 | 0.360472  | -1.290175 |
| Br | 0.583429  | -2.375107 | 0.000000  |

**Cl<sub>3</sub>As···Br<sup>-</sup>****E = -540.10****N<sub>imag</sub> = 0**

|    |           |           |           |
|----|-----------|-----------|-----------|
| As | 0.452922  | 0.264327  | 0.000000  |
| Cl | 0.248881  | 2.692306  | 0.000000  |
| Cl | -0.975203 | -0.008603 | 1.677979  |
| Cl | -0.975203 | -0.008603 | -1.677979 |
| Br | 1.227408  | -2.288391 | 0.000000  |

**Br<sub>3</sub>As···Br<sup>-</sup>****E = -497.12****N<sub>imag</sub> = 0**

|    |           |           |           |
|----|-----------|-----------|-----------|
| As | 0.581753  | 0.122461  | 0.000000  |
| Br | 0.311113  | 2.742456  | 0.000000  |
| Br | -0.929011 | -0.251336 | 1.810385  |
| Br | -0.929011 | -0.251336 | -1.810385 |
| Br | 1.564658  | -2.321615 | 0.000000  |

---

**Table S7.** Cartesian coordinates, bonding energies (in kcal mol<sup>-1</sup>) and the number of imaginary vibrational frequencies ( $N_{\text{imag}}$ ) for all stationary points of  $\text{D}_2\text{Sb}^-$ ,  $\text{D}_3\text{Sb}$  and  $\text{D}_3\text{Sb}\cdots\text{A}^-$  structures, computed at ZORA-M06/QZ4P.

|                                                                                                                                                                                                                                                                                                                                                                                                                                                                                                                                     |           |           |           |          |    |           |          |           |    |           |           |           |                                                                                                                                                                                                                                                                                                                                                                   |           |           |           |                                                                                                                                                                                                                                                                                                                                                                                                                                            |          |           |          |                                                                                                                                                                                                                                                                                                                                                                                                                                                                                                                                     |    |           |           |           |    |           |           |           |    |           |           |           |    |           |           |           |    |          |           |          |
|-------------------------------------------------------------------------------------------------------------------------------------------------------------------------------------------------------------------------------------------------------------------------------------------------------------------------------------------------------------------------------------------------------------------------------------------------------------------------------------------------------------------------------------|-----------|-----------|-----------|----------|----|-----------|----------|-----------|----|-----------|-----------|-----------|-------------------------------------------------------------------------------------------------------------------------------------------------------------------------------------------------------------------------------------------------------------------------------------------------------------------------------------------------------------------|-----------|-----------|-----------|--------------------------------------------------------------------------------------------------------------------------------------------------------------------------------------------------------------------------------------------------------------------------------------------------------------------------------------------------------------------------------------------------------------------------------------------|----------|-----------|----------|-------------------------------------------------------------------------------------------------------------------------------------------------------------------------------------------------------------------------------------------------------------------------------------------------------------------------------------------------------------------------------------------------------------------------------------------------------------------------------------------------------------------------------------|----|-----------|-----------|-----------|----|-----------|-----------|-----------|----|-----------|-----------|-----------|----|-----------|-----------|-----------|----|----------|-----------|----------|
| <p><b><math>\text{F}_2\text{Sb}^-</math></b><br/> <math>E = -390.81</math><br/> <math>N_{\text{imag}} = 0</math></p> <table> <tr><td>Sb</td><td>0.000000</td><td>0.000000</td><td>0.567748</td></tr> <tr><td>F</td><td>0.000000</td><td>1.403194</td><td>-0.729636</td></tr> <tr><td>F</td><td>0.000000</td><td>-1.403194</td><td>-0.729636</td></tr> </table>                                                                                                                                                                      | Sb        | 0.000000  | 0.000000  | 0.567748 | F  | 0.000000  | 1.403194 | -0.729636 | F  | 0.000000  | -1.403194 | -0.729636 | <p><b><math>\text{Cl}_2\text{Sb}^-</math></b><br/> <math>E = -280.45</math><br/> <math>N_{\text{imag}} = 0</math></p> <table> <tr><td>Sb</td><td>0.000000</td><td>0.000000</td><td>0.611682</td></tr> <tr><td>Cl</td><td>0.000000</td><td>1.772166</td><td>-0.932213</td></tr> <tr><td>Cl</td><td>0.000000</td><td>-1.772166</td><td>-0.932213</td></tr> </table> | Sb        | 0.000000  | 0.000000  | 0.611682                                                                                                                                                                                                                                                                                                                                                                                                                                   | Cl       | 0.000000  | 1.772166 | -0.932213                                                                                                                                                                                                                                                                                                                                                                                                                                                                                                                           | Cl | 0.000000  | -1.772166 | -0.932213 |    |           |           |           |    |           |           |           |    |           |           |           |    |          |           |          |
| Sb                                                                                                                                                                                                                                                                                                                                                                                                                                                                                                                                  | 0.000000  | 0.000000  | 0.567748  |          |    |           |          |           |    |           |           |           |                                                                                                                                                                                                                                                                                                                                                                   |           |           |           |                                                                                                                                                                                                                                                                                                                                                                                                                                            |          |           |          |                                                                                                                                                                                                                                                                                                                                                                                                                                                                                                                                     |    |           |           |           |    |           |           |           |    |           |           |           |    |           |           |           |    |          |           |          |
| F                                                                                                                                                                                                                                                                                                                                                                                                                                                                                                                                   | 0.000000  | 1.403194  | -0.729636 |          |    |           |          |           |    |           |           |           |                                                                                                                                                                                                                                                                                                                                                                   |           |           |           |                                                                                                                                                                                                                                                                                                                                                                                                                                            |          |           |          |                                                                                                                                                                                                                                                                                                                                                                                                                                                                                                                                     |    |           |           |           |    |           |           |           |    |           |           |           |    |           |           |           |    |          |           |          |
| F                                                                                                                                                                                                                                                                                                                                                                                                                                                                                                                                   | 0.000000  | -1.403194 | -0.729636 |          |    |           |          |           |    |           |           |           |                                                                                                                                                                                                                                                                                                                                                                   |           |           |           |                                                                                                                                                                                                                                                                                                                                                                                                                                            |          |           |          |                                                                                                                                                                                                                                                                                                                                                                                                                                                                                                                                     |    |           |           |           |    |           |           |           |    |           |           |           |    |           |           |           |    |          |           |          |
| Sb                                                                                                                                                                                                                                                                                                                                                                                                                                                                                                                                  | 0.000000  | 0.000000  | 0.611682  |          |    |           |          |           |    |           |           |           |                                                                                                                                                                                                                                                                                                                                                                   |           |           |           |                                                                                                                                                                                                                                                                                                                                                                                                                                            |          |           |          |                                                                                                                                                                                                                                                                                                                                                                                                                                                                                                                                     |    |           |           |           |    |           |           |           |    |           |           |           |    |           |           |           |    |          |           |          |
| Cl                                                                                                                                                                                                                                                                                                                                                                                                                                                                                                                                  | 0.000000  | 1.772166  | -0.932213 |          |    |           |          |           |    |           |           |           |                                                                                                                                                                                                                                                                                                                                                                   |           |           |           |                                                                                                                                                                                                                                                                                                                                                                                                                                            |          |           |          |                                                                                                                                                                                                                                                                                                                                                                                                                                                                                                                                     |    |           |           |           |    |           |           |           |    |           |           |           |    |           |           |           |    |          |           |          |
| Cl                                                                                                                                                                                                                                                                                                                                                                                                                                                                                                                                  | 0.000000  | -1.772166 | -0.932213 |          |    |           |          |           |    |           |           |           |                                                                                                                                                                                                                                                                                                                                                                   |           |           |           |                                                                                                                                                                                                                                                                                                                                                                                                                                            |          |           |          |                                                                                                                                                                                                                                                                                                                                                                                                                                                                                                                                     |    |           |           |           |    |           |           |           |    |           |           |           |    |           |           |           |    |          |           |          |
| <p><b><math>\text{Br}_2\text{Sb}^-</math></b><br/> <math>E = -252.20</math><br/> <math>N_{\text{imag}} = 0</math></p> <table> <tr><td>Sb</td><td>0.000000</td><td>0.000000</td><td>0.666436</td></tr> <tr><td>Br</td><td>0.000000</td><td>1.899409</td><td>-0.965193</td></tr> <tr><td>Br</td><td>0.000000</td><td>-1.899409</td><td>-0.965193</td></tr> </table>                                                                                                                                                                   | Sb        | 0.000000  | 0.000000  | 0.666436 | Br | 0.000000  | 1.899409 | -0.965193 | Br | 0.000000  | -1.899409 | -0.965193 |                                                                                                                                                                                                                                                                                                                                                                   |           |           |           |                                                                                                                                                                                                                                                                                                                                                                                                                                            |          |           |          |                                                                                                                                                                                                                                                                                                                                                                                                                                                                                                                                     |    |           |           |           |    |           |           |           |    |           |           |           |    |           |           |           |    |          |           |          |
| Sb                                                                                                                                                                                                                                                                                                                                                                                                                                                                                                                                  | 0.000000  | 0.000000  | 0.666436  |          |    |           |          |           |    |           |           |           |                                                                                                                                                                                                                                                                                                                                                                   |           |           |           |                                                                                                                                                                                                                                                                                                                                                                                                                                            |          |           |          |                                                                                                                                                                                                                                                                                                                                                                                                                                                                                                                                     |    |           |           |           |    |           |           |           |    |           |           |           |    |           |           |           |    |          |           |          |
| Br                                                                                                                                                                                                                                                                                                                                                                                                                                                                                                                                  | 0.000000  | 1.899409  | -0.965193 |          |    |           |          |           |    |           |           |           |                                                                                                                                                                                                                                                                                                                                                                   |           |           |           |                                                                                                                                                                                                                                                                                                                                                                                                                                            |          |           |          |                                                                                                                                                                                                                                                                                                                                                                                                                                                                                                                                     |    |           |           |           |    |           |           |           |    |           |           |           |    |           |           |           |    |          |           |          |
| Br                                                                                                                                                                                                                                                                                                                                                                                                                                                                                                                                  | 0.000000  | -1.899409 | -0.965193 |          |    |           |          |           |    |           |           |           |                                                                                                                                                                                                                                                                                                                                                                   |           |           |           |                                                                                                                                                                                                                                                                                                                                                                                                                                            |          |           |          |                                                                                                                                                                                                                                                                                                                                                                                                                                                                                                                                     |    |           |           |           |    |           |           |           |    |           |           |           |    |           |           |           |    |          |           |          |
| <p><b><math>\text{F}_3\text{Sb}</math></b><br/> <math>E = -572.58</math><br/> <math>N_{\text{imag}} = 0</math></p> <table> <tr><td>Sb</td><td>0.000000</td><td>0.000000</td><td>0.722162</td></tr> <tr><td>F</td><td>-0.801030</td><td>1.387425</td><td>-0.286157</td></tr> <tr><td>F</td><td>-0.801030</td><td>-1.387425</td><td>-0.286157</td></tr> <tr><td>F</td><td>1.602060</td><td>0.000000</td><td>-0.286157</td></tr> </table>                                                                                              | Sb        | 0.000000  | 0.000000  | 0.722162 | F  | -0.801030 | 1.387425 | -0.286157 | F  | -0.801030 | -1.387425 | -0.286157 | F                                                                                                                                                                                                                                                                                                                                                                 | 1.602060  | 0.000000  | -0.286157 | <p><b><math>\text{Cl}_3\text{Sb}</math></b><br/> <math>E = -396.78</math><br/> <math>N_{\text{imag}} = 0</math></p> <table> <tr><td>Sb</td><td>0.000000</td><td>0.000000</td><td>0.813112</td></tr> <tr><td>Cl</td><td>-1.015350</td><td>1.758637</td><td>-0.366356</td></tr> <tr><td>Cl</td><td>-1.015350</td><td>-1.758637</td><td>-0.366356</td></tr> <tr><td>Cl</td><td>2.030699</td><td>0.000000</td><td>-0.366356</td></tr> </table> | Sb       | 0.000000  | 0.000000 | 0.813112                                                                                                                                                                                                                                                                                                                                                                                                                                                                                                                            | Cl | -1.015350 | 1.758637  | -0.366356 | Cl | -1.015350 | -1.758637 | -0.366356 | Cl | 2.030699  | 0.000000  | -0.366356 |    |           |           |           |    |          |           |          |
| Sb                                                                                                                                                                                                                                                                                                                                                                                                                                                                                                                                  | 0.000000  | 0.000000  | 0.722162  |          |    |           |          |           |    |           |           |           |                                                                                                                                                                                                                                                                                                                                                                   |           |           |           |                                                                                                                                                                                                                                                                                                                                                                                                                                            |          |           |          |                                                                                                                                                                                                                                                                                                                                                                                                                                                                                                                                     |    |           |           |           |    |           |           |           |    |           |           |           |    |           |           |           |    |          |           |          |
| F                                                                                                                                                                                                                                                                                                                                                                                                                                                                                                                                   | -0.801030 | 1.387425  | -0.286157 |          |    |           |          |           |    |           |           |           |                                                                                                                                                                                                                                                                                                                                                                   |           |           |           |                                                                                                                                                                                                                                                                                                                                                                                                                                            |          |           |          |                                                                                                                                                                                                                                                                                                                                                                                                                                                                                                                                     |    |           |           |           |    |           |           |           |    |           |           |           |    |           |           |           |    |          |           |          |
| F                                                                                                                                                                                                                                                                                                                                                                                                                                                                                                                                   | -0.801030 | -1.387425 | -0.286157 |          |    |           |          |           |    |           |           |           |                                                                                                                                                                                                                                                                                                                                                                   |           |           |           |                                                                                                                                                                                                                                                                                                                                                                                                                                            |          |           |          |                                                                                                                                                                                                                                                                                                                                                                                                                                                                                                                                     |    |           |           |           |    |           |           |           |    |           |           |           |    |           |           |           |    |          |           |          |
| F                                                                                                                                                                                                                                                                                                                                                                                                                                                                                                                                   | 1.602060  | 0.000000  | -0.286157 |          |    |           |          |           |    |           |           |           |                                                                                                                                                                                                                                                                                                                                                                   |           |           |           |                                                                                                                                                                                                                                                                                                                                                                                                                                            |          |           |          |                                                                                                                                                                                                                                                                                                                                                                                                                                                                                                                                     |    |           |           |           |    |           |           |           |    |           |           |           |    |           |           |           |    |          |           |          |
| Sb                                                                                                                                                                                                                                                                                                                                                                                                                                                                                                                                  | 0.000000  | 0.000000  | 0.813112  |          |    |           |          |           |    |           |           |           |                                                                                                                                                                                                                                                                                                                                                                   |           |           |           |                                                                                                                                                                                                                                                                                                                                                                                                                                            |          |           |          |                                                                                                                                                                                                                                                                                                                                                                                                                                                                                                                                     |    |           |           |           |    |           |           |           |    |           |           |           |    |           |           |           |    |          |           |          |
| Cl                                                                                                                                                                                                                                                                                                                                                                                                                                                                                                                                  | -1.015350 | 1.758637  | -0.366356 |          |    |           |          |           |    |           |           |           |                                                                                                                                                                                                                                                                                                                                                                   |           |           |           |                                                                                                                                                                                                                                                                                                                                                                                                                                            |          |           |          |                                                                                                                                                                                                                                                                                                                                                                                                                                                                                                                                     |    |           |           |           |    |           |           |           |    |           |           |           |    |           |           |           |    |          |           |          |
| Cl                                                                                                                                                                                                                                                                                                                                                                                                                                                                                                                                  | -1.015350 | -1.758637 | -0.366356 |          |    |           |          |           |    |           |           |           |                                                                                                                                                                                                                                                                                                                                                                   |           |           |           |                                                                                                                                                                                                                                                                                                                                                                                                                                            |          |           |          |                                                                                                                                                                                                                                                                                                                                                                                                                                                                                                                                     |    |           |           |           |    |           |           |           |    |           |           |           |    |           |           |           |    |          |           |          |
| Cl                                                                                                                                                                                                                                                                                                                                                                                                                                                                                                                                  | 2.030699  | 0.000000  | -0.366356 |          |    |           |          |           |    |           |           |           |                                                                                                                                                                                                                                                                                                                                                                   |           |           |           |                                                                                                                                                                                                                                                                                                                                                                                                                                            |          |           |          |                                                                                                                                                                                                                                                                                                                                                                                                                                                                                                                                     |    |           |           |           |    |           |           |           |    |           |           |           |    |           |           |           |    |          |           |          |
| <p><b><math>\text{Br}_3\text{Sb}</math></b><br/> <math>E = -352.22</math><br/> <math>N_{\text{imag}} = 0</math></p> <table> <tr><td>Sb</td><td>0.000000</td><td>0.000000</td><td>0.902866</td></tr> <tr><td>Br</td><td>-1.091026</td><td>1.889712</td><td>-0.337508</td></tr> <tr><td>Br</td><td>-1.091026</td><td>-1.889712</td><td>-0.337508</td></tr> <tr><td>Br</td><td>2.182051</td><td>0.000000</td><td>-0.337508</td></tr> </table>                                                                                          | Sb        | 0.000000  | 0.000000  | 0.902866 | Br | -1.091026 | 1.889712 | -0.337508 | Br | -1.091026 | -1.889712 | -0.337508 | Br                                                                                                                                                                                                                                                                                                                                                                | 2.182051  | 0.000000  | -0.337508 |                                                                                                                                                                                                                                                                                                                                                                                                                                            |          |           |          |                                                                                                                                                                                                                                                                                                                                                                                                                                                                                                                                     |    |           |           |           |    |           |           |           |    |           |           |           |    |           |           |           |    |          |           |          |
| Sb                                                                                                                                                                                                                                                                                                                                                                                                                                                                                                                                  | 0.000000  | 0.000000  | 0.902866  |          |    |           |          |           |    |           |           |           |                                                                                                                                                                                                                                                                                                                                                                   |           |           |           |                                                                                                                                                                                                                                                                                                                                                                                                                                            |          |           |          |                                                                                                                                                                                                                                                                                                                                                                                                                                                                                                                                     |    |           |           |           |    |           |           |           |    |           |           |           |    |           |           |           |    |          |           |          |
| Br                                                                                                                                                                                                                                                                                                                                                                                                                                                                                                                                  | -1.091026 | 1.889712  | -0.337508 |          |    |           |          |           |    |           |           |           |                                                                                                                                                                                                                                                                                                                                                                   |           |           |           |                                                                                                                                                                                                                                                                                                                                                                                                                                            |          |           |          |                                                                                                                                                                                                                                                                                                                                                                                                                                                                                                                                     |    |           |           |           |    |           |           |           |    |           |           |           |    |           |           |           |    |          |           |          |
| Br                                                                                                                                                                                                                                                                                                                                                                                                                                                                                                                                  | -1.091026 | -1.889712 | -0.337508 |          |    |           |          |           |    |           |           |           |                                                                                                                                                                                                                                                                                                                                                                   |           |           |           |                                                                                                                                                                                                                                                                                                                                                                                                                                            |          |           |          |                                                                                                                                                                                                                                                                                                                                                                                                                                                                                                                                     |    |           |           |           |    |           |           |           |    |           |           |           |    |           |           |           |    |          |           |          |
| Br                                                                                                                                                                                                                                                                                                                                                                                                                                                                                                                                  | 2.182051  | 0.000000  | -0.337508 |          |    |           |          |           |    |           |           |           |                                                                                                                                                                                                                                                                                                                                                                   |           |           |           |                                                                                                                                                                                                                                                                                                                                                                                                                                            |          |           |          |                                                                                                                                                                                                                                                                                                                                                                                                                                                                                                                                     |    |           |           |           |    |           |           |           |    |           |           |           |    |           |           |           |    |          |           |          |
| <p><b><math>\text{F}_3\text{Sb}\cdots\text{F}^-</math></b><br/> <math>E = -781.38</math><br/> <math>N_{\text{imag}} = 0</math></p> <table> <tr><td>Sb</td><td>0.595336</td><td>0.184347</td><td>0.000000</td></tr> <tr><td>F</td><td>0.052902</td><td>2.147485</td><td>0.000000</td></tr> <tr><td>F</td><td>-0.669109</td><td>-0.004238</td><td>1.445482</td></tr> <tr><td>F</td><td>-0.669109</td><td>-0.004238</td><td>-1.445482</td></tr> <tr><td>F</td><td>0.649524</td><td>-1.851555</td><td>0.000000</td></tr> </table>       | Sb        | 0.595336  | 0.184347  | 0.000000 | F  | 0.052902  | 2.147485 | 0.000000  | F  | -0.669109 | -0.004238 | 1.445482  | F                                                                                                                                                                                                                                                                                                                                                                 | -0.669109 | -0.004238 | -1.445482 | F                                                                                                                                                                                                                                                                                                                                                                                                                                          | 0.649524 | -1.851555 | 0.000000 | <p><b><math>\text{Cl}_3\text{Sb}\cdots\text{F}^-</math></b><br/> <math>E = -610.69</math><br/> <math>N_{\text{imag}} = 0</math></p> <table> <tr><td>Sb</td><td>0.656380</td><td>0.111787</td><td>0.000000</td></tr> <tr><td>Cl</td><td>0.171576</td><td>2.715889</td><td>0.000000</td></tr> <tr><td>Cl</td><td>-0.900766</td><td>-0.152291</td><td>1.805164</td></tr> <tr><td>Cl</td><td>-0.900766</td><td>-0.152291</td><td>-1.805164</td></tr> <tr><td>F</td><td>0.895401</td><td>-1.890987</td><td>0.000000</td></tr> </table>   | Sb | 0.656380  | 0.111787  | 0.000000  | Cl | 0.171576  | 2.715889  | 0.000000  | Cl | -0.900766 | -0.152291 | 1.805164  | Cl | -0.900766 | -0.152291 | -1.805164 | F  | 0.895401 | -1.890987 | 0.000000 |
| Sb                                                                                                                                                                                                                                                                                                                                                                                                                                                                                                                                  | 0.595336  | 0.184347  | 0.000000  |          |    |           |          |           |    |           |           |           |                                                                                                                                                                                                                                                                                                                                                                   |           |           |           |                                                                                                                                                                                                                                                                                                                                                                                                                                            |          |           |          |                                                                                                                                                                                                                                                                                                                                                                                                                                                                                                                                     |    |           |           |           |    |           |           |           |    |           |           |           |    |           |           |           |    |          |           |          |
| F                                                                                                                                                                                                                                                                                                                                                                                                                                                                                                                                   | 0.052902  | 2.147485  | 0.000000  |          |    |           |          |           |    |           |           |           |                                                                                                                                                                                                                                                                                                                                                                   |           |           |           |                                                                                                                                                                                                                                                                                                                                                                                                                                            |          |           |          |                                                                                                                                                                                                                                                                                                                                                                                                                                                                                                                                     |    |           |           |           |    |           |           |           |    |           |           |           |    |           |           |           |    |          |           |          |
| F                                                                                                                                                                                                                                                                                                                                                                                                                                                                                                                                   | -0.669109 | -0.004238 | 1.445482  |          |    |           |          |           |    |           |           |           |                                                                                                                                                                                                                                                                                                                                                                   |           |           |           |                                                                                                                                                                                                                                                                                                                                                                                                                                            |          |           |          |                                                                                                                                                                                                                                                                                                                                                                                                                                                                                                                                     |    |           |           |           |    |           |           |           |    |           |           |           |    |           |           |           |    |          |           |          |
| F                                                                                                                                                                                                                                                                                                                                                                                                                                                                                                                                   | -0.669109 | -0.004238 | -1.445482 |          |    |           |          |           |    |           |           |           |                                                                                                                                                                                                                                                                                                                                                                   |           |           |           |                                                                                                                                                                                                                                                                                                                                                                                                                                            |          |           |          |                                                                                                                                                                                                                                                                                                                                                                                                                                                                                                                                     |    |           |           |           |    |           |           |           |    |           |           |           |    |           |           |           |    |          |           |          |
| F                                                                                                                                                                                                                                                                                                                                                                                                                                                                                                                                   | 0.649524  | -1.851555 | 0.000000  |          |    |           |          |           |    |           |           |           |                                                                                                                                                                                                                                                                                                                                                                   |           |           |           |                                                                                                                                                                                                                                                                                                                                                                                                                                            |          |           |          |                                                                                                                                                                                                                                                                                                                                                                                                                                                                                                                                     |    |           |           |           |    |           |           |           |    |           |           |           |    |           |           |           |    |          |           |          |
| Sb                                                                                                                                                                                                                                                                                                                                                                                                                                                                                                                                  | 0.656380  | 0.111787  | 0.000000  |          |    |           |          |           |    |           |           |           |                                                                                                                                                                                                                                                                                                                                                                   |           |           |           |                                                                                                                                                                                                                                                                                                                                                                                                                                            |          |           |          |                                                                                                                                                                                                                                                                                                                                                                                                                                                                                                                                     |    |           |           |           |    |           |           |           |    |           |           |           |    |           |           |           |    |          |           |          |
| Cl                                                                                                                                                                                                                                                                                                                                                                                                                                                                                                                                  | 0.171576  | 2.715889  | 0.000000  |          |    |           |          |           |    |           |           |           |                                                                                                                                                                                                                                                                                                                                                                   |           |           |           |                                                                                                                                                                                                                                                                                                                                                                                                                                            |          |           |          |                                                                                                                                                                                                                                                                                                                                                                                                                                                                                                                                     |    |           |           |           |    |           |           |           |    |           |           |           |    |           |           |           |    |          |           |          |
| Cl                                                                                                                                                                                                                                                                                                                                                                                                                                                                                                                                  | -0.900766 | -0.152291 | 1.805164  |          |    |           |          |           |    |           |           |           |                                                                                                                                                                                                                                                                                                                                                                   |           |           |           |                                                                                                                                                                                                                                                                                                                                                                                                                                            |          |           |          |                                                                                                                                                                                                                                                                                                                                                                                                                                                                                                                                     |    |           |           |           |    |           |           |           |    |           |           |           |    |           |           |           |    |          |           |          |
| Cl                                                                                                                                                                                                                                                                                                                                                                                                                                                                                                                                  | -0.900766 | -0.152291 | -1.805164 |          |    |           |          |           |    |           |           |           |                                                                                                                                                                                                                                                                                                                                                                   |           |           |           |                                                                                                                                                                                                                                                                                                                                                                                                                                            |          |           |          |                                                                                                                                                                                                                                                                                                                                                                                                                                                                                                                                     |    |           |           |           |    |           |           |           |    |           |           |           |    |           |           |           |    |          |           |          |
| F                                                                                                                                                                                                                                                                                                                                                                                                                                                                                                                                   | 0.895401  | -1.890987 | 0.000000  |          |    |           |          |           |    |           |           |           |                                                                                                                                                                                                                                                                                                                                                                   |           |           |           |                                                                                                                                                                                                                                                                                                                                                                                                                                            |          |           |          |                                                                                                                                                                                                                                                                                                                                                                                                                                                                                                                                     |    |           |           |           |    |           |           |           |    |           |           |           |    |           |           |           |    |          |           |          |
| <p><b><math>\text{Br}_3\text{Sb}\cdots\text{F}^-</math></b><br/> <math>E = -566.72</math><br/> <math>N_{\text{imag}} = 0</math></p> <table> <tr><td>Sb</td><td>0.734407</td><td>0.059751</td><td>0.000000</td></tr> <tr><td>Br</td><td>0.237165</td><td>2.857815</td><td>0.000000</td></tr> <tr><td>Br</td><td>-0.915336</td><td>-0.254475</td><td>1.931449</td></tr> <tr><td>Br</td><td>-0.915336</td><td>-0.254475</td><td>-1.931449</td></tr> <tr><td>F</td><td>1.044699</td><td>-1.930373</td><td>0.000000</td></tr> </table>   | Sb        | 0.734407  | 0.059751  | 0.000000 | Br | 0.237165  | 2.857815 | 0.000000  | Br | -0.915336 | -0.254475 | 1.931449  | Br                                                                                                                                                                                                                                                                                                                                                                | -0.915336 | -0.254475 | -1.931449 | F                                                                                                                                                                                                                                                                                                                                                                                                                                          | 1.044699 | -1.930373 | 0.000000 |                                                                                                                                                                                                                                                                                                                                                                                                                                                                                                                                     |    |           |           |           |    |           |           |           |    |           |           |           |    |           |           |           |    |          |           |          |
| Sb                                                                                                                                                                                                                                                                                                                                                                                                                                                                                                                                  | 0.734407  | 0.059751  | 0.000000  |          |    |           |          |           |    |           |           |           |                                                                                                                                                                                                                                                                                                                                                                   |           |           |           |                                                                                                                                                                                                                                                                                                                                                                                                                                            |          |           |          |                                                                                                                                                                                                                                                                                                                                                                                                                                                                                                                                     |    |           |           |           |    |           |           |           |    |           |           |           |    |           |           |           |    |          |           |          |
| Br                                                                                                                                                                                                                                                                                                                                                                                                                                                                                                                                  | 0.237165  | 2.857815  | 0.000000  |          |    |           |          |           |    |           |           |           |                                                                                                                                                                                                                                                                                                                                                                   |           |           |           |                                                                                                                                                                                                                                                                                                                                                                                                                                            |          |           |          |                                                                                                                                                                                                                                                                                                                                                                                                                                                                                                                                     |    |           |           |           |    |           |           |           |    |           |           |           |    |           |           |           |    |          |           |          |
| Br                                                                                                                                                                                                                                                                                                                                                                                                                                                                                                                                  | -0.915336 | -0.254475 | 1.931449  |          |    |           |          |           |    |           |           |           |                                                                                                                                                                                                                                                                                                                                                                   |           |           |           |                                                                                                                                                                                                                                                                                                                                                                                                                                            |          |           |          |                                                                                                                                                                                                                                                                                                                                                                                                                                                                                                                                     |    |           |           |           |    |           |           |           |    |           |           |           |    |           |           |           |    |          |           |          |
| Br                                                                                                                                                                                                                                                                                                                                                                                                                                                                                                                                  | -0.915336 | -0.254475 | -1.931449 |          |    |           |          |           |    |           |           |           |                                                                                                                                                                                                                                                                                                                                                                   |           |           |           |                                                                                                                                                                                                                                                                                                                                                                                                                                            |          |           |          |                                                                                                                                                                                                                                                                                                                                                                                                                                                                                                                                     |    |           |           |           |    |           |           |           |    |           |           |           |    |           |           |           |    |          |           |          |
| F                                                                                                                                                                                                                                                                                                                                                                                                                                                                                                                                   | 1.044699  | -1.930373 | 0.000000  |          |    |           |          |           |    |           |           |           |                                                                                                                                                                                                                                                                                                                                                                   |           |           |           |                                                                                                                                                                                                                                                                                                                                                                                                                                            |          |           |          |                                                                                                                                                                                                                                                                                                                                                                                                                                                                                                                                     |    |           |           |           |    |           |           |           |    |           |           |           |    |           |           |           |    |          |           |          |
| <p><b><math>\text{F}_3\text{Sb}\cdots\text{Cl}^-</math></b><br/> <math>E = -727.75</math><br/> <math>N_{\text{imag}} = 0</math></p> <table> <tr><td>Sb</td><td>0.565157</td><td>0.283126</td><td>0.000000</td></tr> <tr><td>F</td><td>0.124801</td><td>2.238750</td><td>0.000000</td></tr> <tr><td>F</td><td>-0.718724</td><td>0.095962</td><td>1.419111</td></tr> <tr><td>F</td><td>-0.718724</td><td>0.095962</td><td>-1.419111</td></tr> <tr><td>Cl</td><td>0.768715</td><td>-2.351540</td><td>0.000000</td></tr> </table>       | Sb        | 0.565157  | 0.283126  | 0.000000 | F  | 0.124801  | 2.238750 | 0.000000  | F  | -0.718724 | 0.095962  | 1.419111  | F                                                                                                                                                                                                                                                                                                                                                                 | -0.718724 | 0.095962  | -1.419111 | Cl                                                                                                                                                                                                                                                                                                                                                                                                                                         | 0.768715 | -2.351540 | 0.000000 | <p><b><math>\text{Cl}_3\text{Sb}\cdots\text{Cl}^-</math></b><br/> <math>E = -555.78</math><br/> <math>N_{\text{imag}} = 0</math></p> <table> <tr><td>Sb</td><td>0.614244</td><td>0.148534</td><td>0.000000</td></tr> <tr><td>Cl</td><td>0.156546</td><td>2.699643</td><td>0.000000</td></tr> <tr><td>Cl</td><td>-0.946801</td><td>-0.154570</td><td>1.788222</td></tr> <tr><td>Cl</td><td>-0.946801</td><td>-0.154570</td><td>-1.788222</td></tr> <tr><td>Cl</td><td>1.144570</td><td>-2.388602</td><td>0.000000</td></tr> </table> | Sb | 0.614244  | 0.148534  | 0.000000  | Cl | 0.156546  | 2.699643  | 0.000000  | Cl | -0.946801 | -0.154570 | 1.788222  | Cl | -0.946801 | -0.154570 | -1.788222 | Cl | 1.144570 | -2.388602 | 0.000000 |
| Sb                                                                                                                                                                                                                                                                                                                                                                                                                                                                                                                                  | 0.565157  | 0.283126  | 0.000000  |          |    |           |          |           |    |           |           |           |                                                                                                                                                                                                                                                                                                                                                                   |           |           |           |                                                                                                                                                                                                                                                                                                                                                                                                                                            |          |           |          |                                                                                                                                                                                                                                                                                                                                                                                                                                                                                                                                     |    |           |           |           |    |           |           |           |    |           |           |           |    |           |           |           |    |          |           |          |
| F                                                                                                                                                                                                                                                                                                                                                                                                                                                                                                                                   | 0.124801  | 2.238750  | 0.000000  |          |    |           |          |           |    |           |           |           |                                                                                                                                                                                                                                                                                                                                                                   |           |           |           |                                                                                                                                                                                                                                                                                                                                                                                                                                            |          |           |          |                                                                                                                                                                                                                                                                                                                                                                                                                                                                                                                                     |    |           |           |           |    |           |           |           |    |           |           |           |    |           |           |           |    |          |           |          |
| F                                                                                                                                                                                                                                                                                                                                                                                                                                                                                                                                   | -0.718724 | 0.095962  | 1.419111  |          |    |           |          |           |    |           |           |           |                                                                                                                                                                                                                                                                                                                                                                   |           |           |           |                                                                                                                                                                                                                                                                                                                                                                                                                                            |          |           |          |                                                                                                                                                                                                                                                                                                                                                                                                                                                                                                                                     |    |           |           |           |    |           |           |           |    |           |           |           |    |           |           |           |    |          |           |          |
| F                                                                                                                                                                                                                                                                                                                                                                                                                                                                                                                                   | -0.718724 | 0.095962  | -1.419111 |          |    |           |          |           |    |           |           |           |                                                                                                                                                                                                                                                                                                                                                                   |           |           |           |                                                                                                                                                                                                                                                                                                                                                                                                                                            |          |           |          |                                                                                                                                                                                                                                                                                                                                                                                                                                                                                                                                     |    |           |           |           |    |           |           |           |    |           |           |           |    |           |           |           |    |          |           |          |
| Cl                                                                                                                                                                                                                                                                                                                                                                                                                                                                                                                                  | 0.768715  | -2.351540 | 0.000000  |          |    |           |          |           |    |           |           |           |                                                                                                                                                                                                                                                                                                                                                                   |           |           |           |                                                                                                                                                                                                                                                                                                                                                                                                                                            |          |           |          |                                                                                                                                                                                                                                                                                                                                                                                                                                                                                                                                     |    |           |           |           |    |           |           |           |    |           |           |           |    |           |           |           |    |          |           |          |
| Sb                                                                                                                                                                                                                                                                                                                                                                                                                                                                                                                                  | 0.614244  | 0.148534  | 0.000000  |          |    |           |          |           |    |           |           |           |                                                                                                                                                                                                                                                                                                                                                                   |           |           |           |                                                                                                                                                                                                                                                                                                                                                                                                                                            |          |           |          |                                                                                                                                                                                                                                                                                                                                                                                                                                                                                                                                     |    |           |           |           |    |           |           |           |    |           |           |           |    |           |           |           |    |          |           |          |
| Cl                                                                                                                                                                                                                                                                                                                                                                                                                                                                                                                                  | 0.156546  | 2.699643  | 0.000000  |          |    |           |          |           |    |           |           |           |                                                                                                                                                                                                                                                                                                                                                                   |           |           |           |                                                                                                                                                                                                                                                                                                                                                                                                                                            |          |           |          |                                                                                                                                                                                                                                                                                                                                                                                                                                                                                                                                     |    |           |           |           |    |           |           |           |    |           |           |           |    |           |           |           |    |          |           |          |
| Cl                                                                                                                                                                                                                                                                                                                                                                                                                                                                                                                                  | -0.946801 | -0.154570 | 1.788222  |          |    |           |          |           |    |           |           |           |                                                                                                                                                                                                                                                                                                                                                                   |           |           |           |                                                                                                                                                                                                                                                                                                                                                                                                                                            |          |           |          |                                                                                                                                                                                                                                                                                                                                                                                                                                                                                                                                     |    |           |           |           |    |           |           |           |    |           |           |           |    |           |           |           |    |          |           |          |
| Cl                                                                                                                                                                                                                                                                                                                                                                                                                                                                                                                                  | -0.946801 | -0.154570 | -1.788222 |          |    |           |          |           |    |           |           |           |                                                                                                                                                                                                                                                                                                                                                                   |           |           |           |                                                                                                                                                                                                                                                                                                                                                                                                                                            |          |           |          |                                                                                                                                                                                                                                                                                                                                                                                                                                                                                                                                     |    |           |           |           |    |           |           |           |    |           |           |           |    |           |           |           |    |          |           |          |
| Cl                                                                                                                                                                                                                                                                                                                                                                                                                                                                                                                                  | 1.144570  | -2.388602 | 0.000000  |          |    |           |          |           |    |           |           |           |                                                                                                                                                                                                                                                                                                                                                                   |           |           |           |                                                                                                                                                                                                                                                                                                                                                                                                                                            |          |           |          |                                                                                                                                                                                                                                                                                                                                                                                                                                                                                                                                     |    |           |           |           |    |           |           |           |    |           |           |           |    |           |           |           |    |          |           |          |
| <p><b><math>\text{Br}_3\text{Sb}\cdots\text{Cl}^-</math></b><br/> <math>E = -512.00</math><br/> <math>N_{\text{imag}} = 0</math></p> <table> <tr><td>Sb</td><td>0.712180</td><td>0.101959</td><td>0.000000</td></tr> <tr><td>Br</td><td>0.217989</td><td>2.839521</td><td>0.000000</td></tr> <tr><td>Br</td><td>-0.937925</td><td>-0.268048</td><td>1.916640</td></tr> <tr><td>Br</td><td>-0.937925</td><td>-0.268048</td><td>-1.916640</td></tr> <tr><td>Cl</td><td>1.364108</td><td>-2.394354</td><td>0.000000</td></tr> </table> | Sb        | 0.712180  | 0.101959  | 0.000000 | Br | 0.217989  | 2.839521 | 0.000000  | Br | -0.937925 | -0.268048 | 1.916640  | Br                                                                                                                                                                                                                                                                                                                                                                | -0.937925 | -0.268048 | -1.916640 | Cl                                                                                                                                                                                                                                                                                                                                                                                                                                         | 1.364108 | -2.394354 | 0.000000 |                                                                                                                                                                                                                                                                                                                                                                                                                                                                                                                                     |    |           |           |           |    |           |           |           |    |           |           |           |    |           |           |           |    |          |           |          |
| Sb                                                                                                                                                                                                                                                                                                                                                                                                                                                                                                                                  | 0.712180  | 0.101959  | 0.000000  |          |    |           |          |           |    |           |           |           |                                                                                                                                                                                                                                                                                                                                                                   |           |           |           |                                                                                                                                                                                                                                                                                                                                                                                                                                            |          |           |          |                                                                                                                                                                                                                                                                                                                                                                                                                                                                                                                                     |    |           |           |           |    |           |           |           |    |           |           |           |    |           |           |           |    |          |           |          |
| Br                                                                                                                                                                                                                                                                                                                                                                                                                                                                                                                                  | 0.217989  | 2.839521  | 0.000000  |          |    |           |          |           |    |           |           |           |                                                                                                                                                                                                                                                                                                                                                                   |           |           |           |                                                                                                                                                                                                                                                                                                                                                                                                                                            |          |           |          |                                                                                                                                                                                                                                                                                                                                                                                                                                                                                                                                     |    |           |           |           |    |           |           |           |    |           |           |           |    |           |           |           |    |          |           |          |
| Br                                                                                                                                                                                                                                                                                                                                                                                                                                                                                                                                  | -0.937925 | -0.268048 | 1.916640  |          |    |           |          |           |    |           |           |           |                                                                                                                                                                                                                                                                                                                                                                   |           |           |           |                                                                                                                                                                                                                                                                                                                                                                                                                                            |          |           |          |                                                                                                                                                                                                                                                                                                                                                                                                                                                                                                                                     |    |           |           |           |    |           |           |           |    |           |           |           |    |           |           |           |    |          |           |          |
| Br                                                                                                                                                                                                                                                                                                                                                                                                                                                                                                                                  | -0.937925 | -0.268048 | -1.916640 |          |    |           |          |           |    |           |           |           |                                                                                                                                                                                                                                                                                                                                                                   |           |           |           |                                                                                                                                                                                                                                                                                                                                                                                                                                            |          |           |          |                                                                                                                                                                                                                                                                                                                                                                                                                                                                                                                                     |    |           |           |           |    |           |           |           |    |           |           |           |    |           |           |           |    |          |           |          |
| Cl                                                                                                                                                                                                                                                                                                                                                                                                                                                                                                                                  | 1.364108  | -2.394354 | 0.000000  |          |    |           |          |           |    |           |           |           |                                                                                                                                                                                                                                                                                                                                                                   |           |           |           |                                                                                                                                                                                                                                                                                                                                                                                                                                            |          |           |          |                                                                                                                                                                                                                                                                                                                                                                                                                                                                                                                                     |    |           |           |           |    |           |           |           |    |           |           |           |    |           |           |           |    |          |           |          |

---

**F<sub>3</sub>Sb···Br<sup>-</sup>****E = -713.71****N<sub>imag</sub> = 0**

|    |           |           |           |
|----|-----------|-----------|-----------|
| Sb | 0.533256  | 0.426676  | 0.000000  |
| F  | 0.139622  | 2.383114  | 0.000000  |
| F  | -0.755540 | 0.253135  | 1.414293  |
| F  | -0.755540 | 0.253135  | -1.414293 |
| Br | 0.765369  | -2.403448 | 0.000000  |

**Cl<sub>3</sub>Sb···Br<sup>-</sup>****E = -541.59****N<sub>imag</sub> = 0**

|    |           |           |           |
|----|-----------|-----------|-----------|
| Sb | 0.593711  | 0.220878  | 0.000000  |
| Cl | 0.123130  | 2.754101  | 0.000000  |
| Cl | -0.963961 | -0.105965 | 1.784919  |
| Cl | -0.963961 | -0.105965 | -1.784919 |
| Br | 1.245475  | -2.481383 | 0.000000  |

**Br<sub>3</sub>Sb···Br<sup>-</sup>****E = -497.77****N<sub>imag</sub> = 0**

|    |           |           |           |
|----|-----------|-----------|-----------|
| Sb | 0.708896  | 0.154014  | 0.000000  |
| Br | 0.181578  | 2.869408  | 0.000000  |
| Br | -0.933794 | -0.252768 | 1.913972  |
| Br | -0.933794 | -0.252768 | -1.913972 |
| Br | 1.508974  | -2.494043 | 0.000000  |

---
